# Supplementary material for: Knockdown of RBM15 inhibits tumor progression and the JAK-STAT signaling pathway in cervical cancer
Source: Springer Nature journal article supplement (doi:10.1186/s12885-023-11163-z), 2023-07-20

Figure 7D RBM15

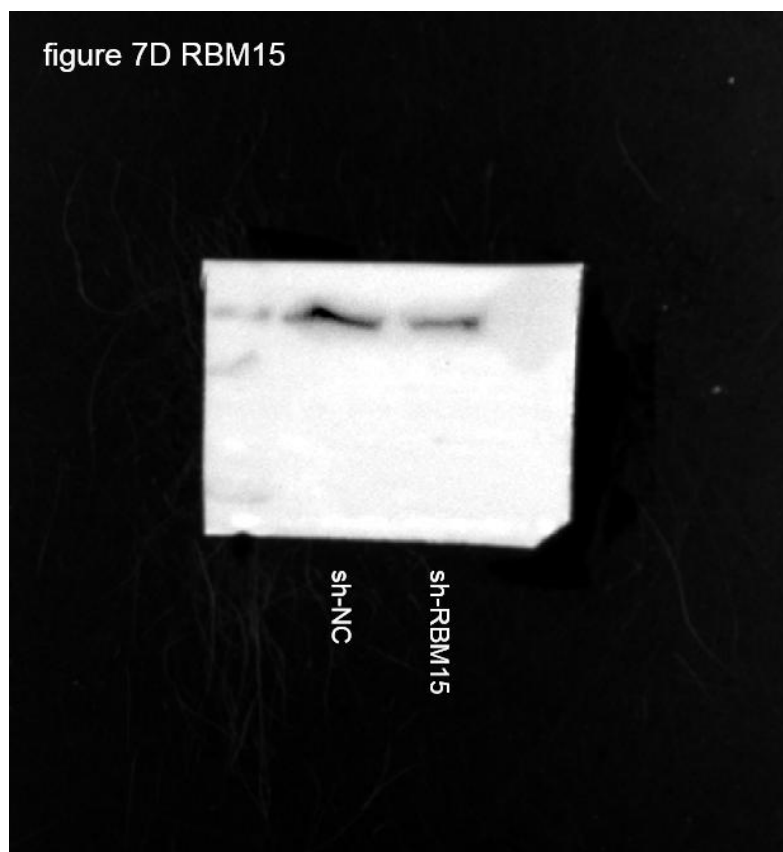

Figure 7D  $\beta$ -actin

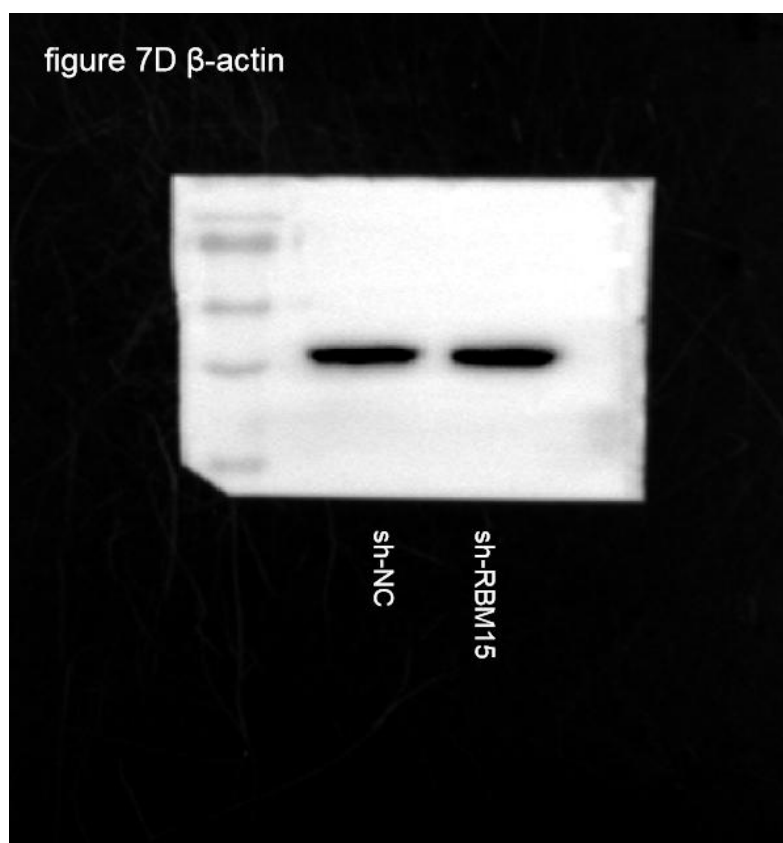

Figure 8C iNOS

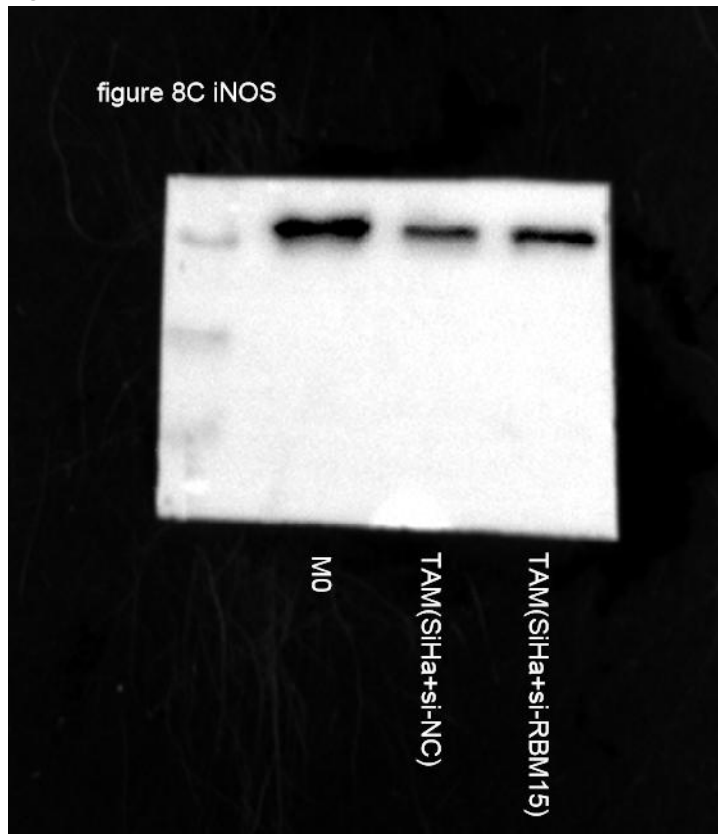

Figure 8C CD206

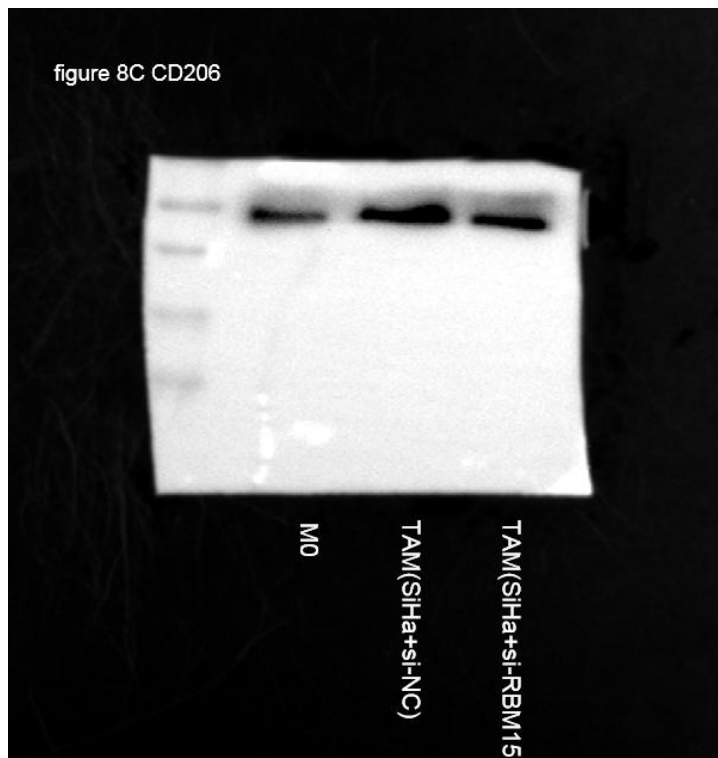

Figure 8C  $\beta$ -actin

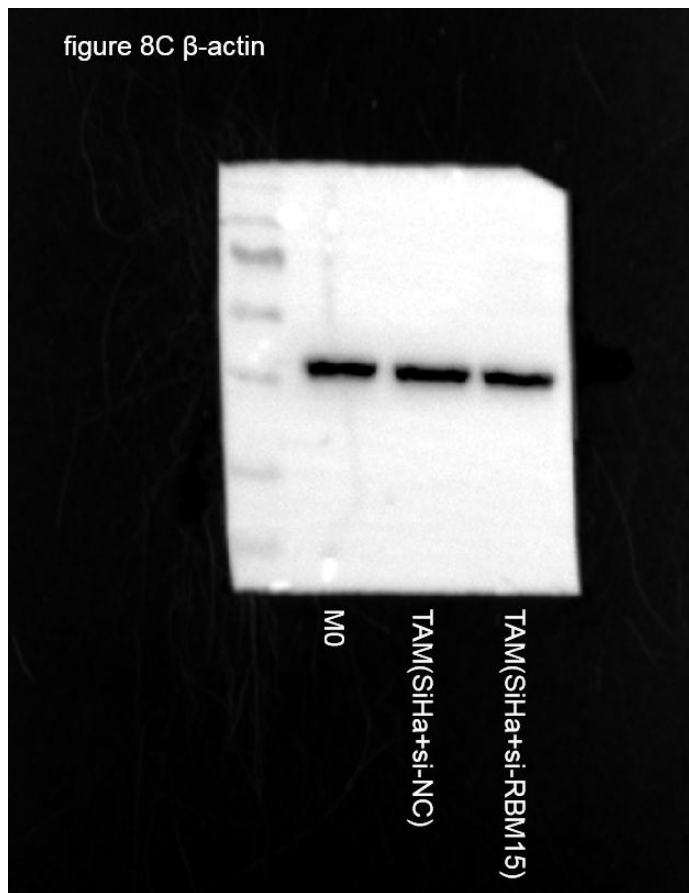

Figure 8D iNOS

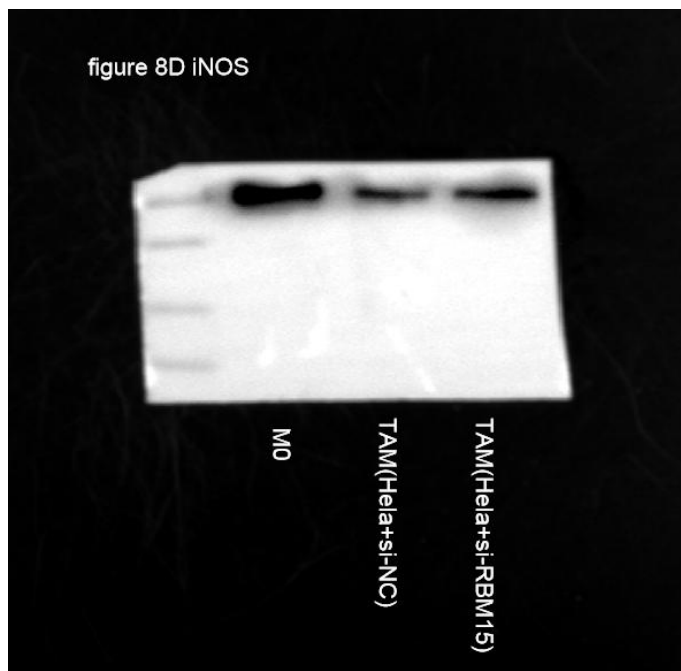

Figure 8D CD206

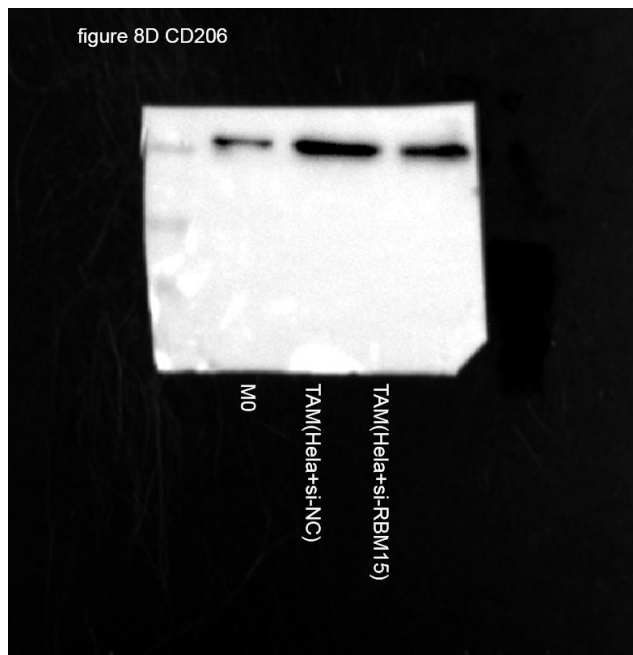

Figure 8D  $\beta$ -actin

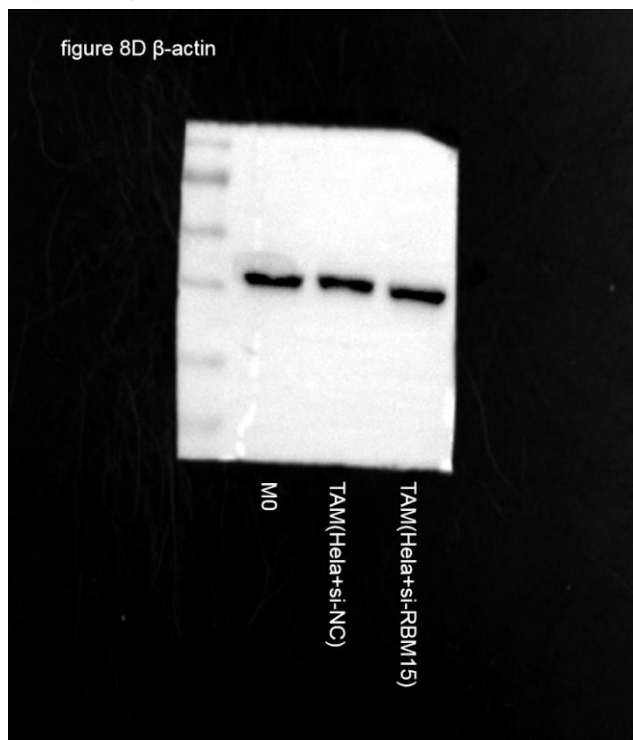

Supplement: MOESM8 [file 25826464]
