# Supplementary material for: Knockdown of RBM15 inhibits tumor progression and the JAK-STAT signaling pathway in cervical cancer
Source: BMC Cancer. 2023 Jul 20;23:684. doi: 10.1186/s12885-023-11163-z (PMC10360283; doi:10.1186/s12885-023-11163-z)
Supplement: Supplementary file 4 — Supplementary Material 4 [file 12885_2023_11163_MOESM4_ESM.xlsx]

## Sheet: Sheet1
Gene.symbol	Gene.title
CRNN	cornulin
MAL	mal, T-cell differentiation protein
ENDOU	endonuclease, poly(U) specific
HOPX	HOP homeobox
CDKN2A	cyclin dependent kinase inhibitor 2A
CRYAB	crystallin alpha B
UPK1A	uroplakin 1A
PPP1R3C	protein phosphatase 1 regulatory subunit 3C
SLURP1	secreted LY6/PLAUR domain containing 1
EDN3	endothelin 3
EMP1	epithelial membrane protein 1
SPP1	secreted phosphoprotein 1
KRT1	keratin 1
ESR1	estrogen receptor 1
DSG1	desmoglein 1
KAT2B	lysine acetyltransferase 2B
CHAF1A	chromatin assembly factor 1 subunit A
KANK1	KN motif and ankyrin repeat domains 1
PPL	periplakin
GPX3	glutathione peroxidase 3
ALOX12	arachidonate 12-lipoxygenase, 12S type
ACPP	acid phosphatase, prostate
SLC27A6	solute carrier family 27 member 6
KLF4	Kruppel like factor 4
CWH43	cell wall biogenesis 43 C-terminal homolog
BBOX1	gamma-butyrobetaine hydroxylase 1
HSPB8	heat shock protein family B (small) member 8
CRISP3	cysteine rich secretory protein 3
MCM2	minichromosome maintenance complex component 2
FCER1A	Fc fragment of IgE receptor Ia
GYS2	glycogen synthase 2
SPINK5	serine peptidase inhibitor, Kazal type 5
MMP1	matrix metallopeptidase 1
CFD	complement factor D
TUBB2A	tubulin beta 2A class IIa
APOC1	apolipoprotein C1
IVL	involucrin
KLK12	kallikrein related peptidase 12
KCNK7	potassium two pore domain channel subfamily K member 7
EREG	epiregulin
DSC2	desmocollin 2
KLK13	kallikrein related peptidase 13
MIR4680///PDCD4	microRNA 4680///programmed cell death 4 (neoplastic transformation inhibitor)
DTL	denticleless E3 ubiquitin protein ligase homolog
ZNF185	zinc finger protein 185 (LIM domain)
NSG1	neuron specific gene family member 1
HPGD	hydroxyprostaglandin dehydrogenase 15-(NAD)
SCEL	sciellin
IL1RN	interleukin 1 receptor antagonist
WHSC1	Wolf-Hirschhorn syndrome candidate 1
C2orf54	chromosome 2 open reading frame 54
RAD54L	RAD54-like (S. cerevisiae)
MUC1	mucin 1, cell surface associated
CDA	cytidine deaminase
SASH1	SAM and SH3 domain containing 1
INHBA	inhibin beta A subunit
AFDN	afadin, adherens junction formation factor
KIF18B	kinesin family member 18B
KRT10	keratin 10
GLTP	glycolipid transfer protein
PDLIM2	PDZ and LIM domain 2
PDGFD	platelet derived growth factor D
KNTC1	kinetochore associated 1
MIR22///MIR22HG	microRNA 22///MIR22 host gene
TMPRSS11E	transmembrane protease, serine 11E
SYNGR3	synaptogyrin 3
NEK2	NIMA related kinase 2
LYPD3	LY6/PLAUR domain containing 3
GINS2	GINS complex subunit 2
SULT2B1	sulfotransferase family 2B member 1
CRCT1	cysteine rich C-terminal 1
HELLS	helicase, lymphoid-specific
GSTA4	glutathione S-transferase alpha 4
NUP210	nucleoporin 210
AREG	amphiregulin
TTC22	tetratricopeptide repeat domain 22
PITPNA	phosphatidylinositol transfer protein alpha
IL17RC	interleukin 17 receptor C
TMPRSS11D	transmembrane protease, serine 11D
SPINK2	serine peptidase inhibitor, Kazal type 2
MCM5	minichromosome maintenance complex component 5
ZNF771	zinc finger protein 771
NCAPH	non-SMC condensin I complex subunit H
NAV3	neuron navigator 3
GREB1	growth regulation by estrogen in breast cancer 1
RHCG	Rh family C glycoprotein
GAS7	growth arrest specific 7
CLIC3	chloride intracellular channel 3
GALR3	galanin receptor 3
TGM3	transglutaminase 3
DUSP1	dual specificity phosphatase 1
CCNF	cyclin F
CDC25A	cell division cycle 25A
FOXM1	forkhead box M1
SLC5A1	solute carrier family 5 member 1
LGALSL	galectin like
PGLYRP4	peptidoglycan recognition protein 4
APOD	apolipoprotein D
KRT2	keratin 2
AVPR1B	arginine vasopressin receptor 1B
CRABP2	cellular retinoic acid binding protein 2
NAGK	N-acetylglucosamine kinase
AURKA	aurora kinase A
CLCA4	chloride channel accessory 4
FGFR2	fibroblast growth factor receptor 2
HIGD1A	HIG1 hypoxia inducible domain family member 1A
CD24	CD24 molecule
SPRR1A	small proline rich protein 1A
CAB39L	calcium binding protein 39 like
LY6G6C	lymphocyte antigen 6 complex, locus G6C
CXCR2	C-X-C motif chemokine receptor 2
ZBED2	zinc finger BED-type containing 2
GJA1	gap junction protein alpha 1
TUBB2B///TUBB2A	tubulin beta 2B class IIb///tubulin beta 2A class IIa
C1orf112	chromosome 1 open reading frame 112
PHYHIP	phytanoyl-CoA 2-hydroxylase interacting protein
TYMS	thymidylate synthetase
KLK8	kallikrein related peptidase 8
DSG2	desmoglein 2
DPP4	dipeptidyl peptidase 4
VAT1	vesicle amine transport 1
ARHGAP4	Rho GTPase activating protein 4
TP53AIP1	tumor protein p53 regulated apoptosis inducing protein 1
TOM1	target of myb1 membrane trafficking protein
KLK11	kallikrein related peptidase 11
LPAR6	lysophosphatidic acid receptor 6
TRPS1	transcriptional repressor GATA binding 1
PIM1	Pim-1 proto-oncogene, serine/threonine kinase
GTSE1	G2 and S-phase expressed 1
DNAJB1	DnaJ heat shock protein family (Hsp40) member B1
ZSCAN18	zinc finger and SCAN domain containing 18
UBE2C	ubiquitin conjugating enzyme E2 C
GFOD2	glucose-fructose oxidoreductase domain containing 2
EPB41L3	erythrocyte membrane protein band 4.1 like 3
NUAK2///AKIP1	NUAK family kinase 2///A-kinase interacting protein 1
SOSTDC1	sclerostin domain containing 1
TOLLIP	toll interacting protein
CELSR3	cadherin EGF LAG seven-pass G-type receptor 3
ZNF273	zinc finger protein 273
TJP1	tight junction protein 1
CDCA8	cell division cycle associated 8
SLC24A3	solute carrier family 24 member 3
ENDOD1	endonuclease domain containing 1
GINS1	GINS complex subunit 1
NUP62	nucleoporin 62
S100A12	S100 calcium binding protein A12
ZFP36	ZFP36 ring finger protein
SYCP2	synaptonemal complex protein 2
HBEGF	heparin binding EGF like growth factor
SPARCL1	SPARC like 1
TMEM9B	TMEM9 domain family member B
LOR	loricrin
IL18	interleukin 18
ITPR2	inositol 1,4,5-trisphosphate receptor type 2
NOD2	nucleotide binding oligomerization domain containing 2
S100A14	S100 calcium binding protein A14
CYP3A7-CYP3A51P	CYP3A7-CYP3A51P readthrough
DEGS1	delta 4-desaturase, sphingolipid 1
MCM6	minichromosome maintenance complex component 6
AHNAK	AHNAK nucleoprotein
FUT6	fucosyltransferase 6
ECT2	epithelial cell transforming 2
TP53I3	tumor protein p53 inducible protein 3
PLCD1	phospholipase C delta 1
ABLIM1	actin binding LIM protein 1
SAC3D1	SAC3 domain containing 1
ZNF93	zinc finger protein 93
TM7SF2	transmembrane 7 superfamily member 2
KLF6	Kruppel like factor 6
MREG	melanoregulin
WNK1	WNK lysine deficient protein kinase 1
DBI	diazepam binding inhibitor, acyl-CoA binding protein
CXCL13	C-X-C motif chemokine ligand 13
SPRR3	small proline rich protein 3
KLK10	kallikrein related peptidase 10
CHAF1B	chromatin assembly factor 1 subunit B
PKP3	plakophilin 3
THSD4	thrombospondin type 1 domain containing 4
NUP62CL	nucleoporin 62 C-terminal like
PRSS3	protease, serine 3
PRR5-ARHGAP8///ARHGAP8	PRR5-ARHGAP8 readthrough///Rho GTPase activating protein 8
MIR6787///SLC16A3	microRNA 6787///solute carrier family 16 member 3
FOS	Fos proto-oncogene, AP-1 transcription factor subunit
SLC45A2	solute carrier family 45 member 2
KIF14	kinesin family member 14
FOSL2	FOS like 2, AP-1 transcription factor subunit
ME1	malic enzyme 1
DYNLL1	dynein light chain LC8-type 1
CLTB	clathrin light chain B
UBD///GABBR1	ubiquitin D///gamma-aminobutyric acid type B receptor subunit 1
TIMELESS	timeless circadian clock
SPAG5	sperm associated antigen 5
LIG1	DNA ligase 1
LYST	lysosomal trafficking regulator
ISG15	ISG15 ubiquitin-like modifier
BST2	bone marrow stromal cell antigen 2
APOL1	apolipoprotein L1
PLD1	phospholipase D1
SNORA41///EEF1B2	small nucleolar RNA, H/ACA box 41///eukaryotic translation elongation factor 1 beta 2
SEL1L3	SEL1L family member 3
KIF2C	kinesin family member 2C
ZDHHC3	zinc finger DHHC-type containing 3
CALML3	calmodulin like 3
ATP10D	ATPase phospholipid transporting 10D (putative)
RPS6KA1	ribosomal protein S6 kinase A1
SPRR2B	small proline rich protein 2B
TPX2	TPX2, microtubule nucleation factor
COL21A1	collagen type XXI alpha 1 chain
EIF1	eukaryotic translation initiation factor 1
ANXA1	annexin A1
DDAH2	dimethylarginine dimethylaminohydrolase 2
CYP2C18	cytochrome P450 family 2 subfamily C member 18
TK1	thymidine kinase 1
CAMSAP1	calmodulin regulated spectrin associated protein 1
RPL29	ribosomal protein L29
AR	androgen receptor
TBX3	T-box 3
EVPL	envoplakin
BEX4	brain expressed X-linked 4
MIR6734///ELOVL1	microRNA 6734///ELOVL fatty acid elongase 1
CDC6	cell division cycle 6
FRMD4B	FERM domain containing 4B
GDPD3	glycerophosphodiester phosphodiesterase domain containing 3
MAFF	MAF bZIP transcription factor F
SERPINB13	serpin family B member 13
GOLGA4	golgin A4
PRSS3P2	protease, serine 3 pseudogene 2
EPN2-IT1///EPN2	EPN2 intronic transcript 1///epsin 2
BBIP1	BBSome interacting protein 1
EPHA1	EPH receptor A1
CYP3A5	cytochrome P450 family 3 subfamily A member 5
MSH5-SAPCD1///SAPCD1///MSH5	MSH5-SAPCD1 readthrough (NMD candidate)///suppressor APC domain containing 1///mutS homolog 5
LMBRD1	LMBR1 domain containing 1
GSTM5	glutathione S-transferase mu 5
MMP12	matrix metallopeptidase 12
PTGDS	prostaglandin D2 synthase
SERPINB1	serpin family B member 1
ALOX12B	arachidonate 12-lipoxygenase, 12R type
MELK	maternal embryonic leucine zipper kinase
RHOB	ras homolog family member B
PDCD6IP	programmed cell death 6 interacting protein
UBL3	ubiquitin like 3
GATM	glycine amidinotransferase
TRAF4	TNF receptor associated factor 4
TACC3	transforming acidic coiled-coil containing protein 3
TSPO	translocator protein
SCNN1B	sodium channel epithelial 1 beta subunit
PLPP2	phospholipid phosphatase 2
DCN	decorin
SNURF///SNRPN	SNRPN upstream reading frame///small nuclear ribonucleoprotein polypeptide N
MPZL2	myelin protein zero like 2
RNH1	ribonuclease/angiogenin inhibitor 1
CLCN3	chloride voltage-gated channel 3
CLDN17	claudin 17
TGM5	transglutaminase 5
CD177	CD177 molecule
MOCOS	molybdenum cofactor sulfurase
IER2	immediate early response 2
OCA2	OCA2 melanosomal transmembrane protein
TIPARP	TCDD inducible poly(ADP-ribose) polymerase
XRCC3	X-ray repair cross complementing 3
TRIM13	tripartite motif containing 13
EPS8L2	EPS8 like 2
SLC39A2	solute carrier family 39 member 2
OPN1SW	opsin 1 (cone pigments), short-wave-sensitive
KIF4A	kinesin family member 4A
CCL18	C-C motif chemokine ligand 18
TNFRSF25	TNF receptor superfamily member 25
RANBP9	RAN binding protein 9
SH3BGRL	SH3 domain binding glutamate rich protein like
BLNK	B-cell linker
PLSCR1	phospholipid scramblase 1
CD207	CD207 molecule
POLA2	DNA polymerase alpha 2, accessory subunit
PGRMC2	progesterone receptor membrane component 2
MCM7	minichromosome maintenance complex component 7
ACAA1	acetyl-CoA acyltransferase 1
CLIP1	CAP-Gly domain containing linker protein 1
KCTD15	potassium channel tetramerization domain containing 15
ALOX15B	arachidonate 15-lipoxygenase, type B
GDF15	growth differentiation factor 15
FUT3	fucosyltransferase 3 (Lewis blood group)
CITED2	Cbp/p300 interacting transactivator with Glu/Asp rich carboxy-terminal domain 2
ACOX2	acyl-CoA oxidase 2
SOWAHC	sosondowah ankyrin repeat domain family member C
RNF11	ring finger protein 11
IFI30///PIK3R2	IFI30, lysosomal thiol reductase///phosphoinositide-3-kinase regulatory subunit 2
RND3	Rho family GTPase 3
PEBP1	phosphatidylethanolamine binding protein 1
FIS1	fission, mitochondrial 1
KRT13	keratin 13
PTGER3	prostaglandin E receptor 3
RFC4	replication factor C subunit 4
NDRG4	NDRG family member 4
PPP2R5A	protein phosphatase 2 regulatory subunit B'alpha
OBFC1	oligonucleotide/oligosaccharide binding fold containing 1
HMGCR	3-hydroxy-3-methylglutaryl-CoA reductase
CDT1	chromatin licensing and DNA replication factor 1
CELSR1	cadherin EGF LAG seven-pass G-type receptor 1
MGLL	monoglyceride lipase
SMAGP	small cell adhesion glycoprotein
HMGB3	high mobility group box 3
SLC35C1	solute carrier family 35 member C1
SLC6A8	solute carrier family 6 member 8
PINK1	PTEN induced putative kinase 1
TRIM16	tripartite motif containing 16
TOB1	transducer of ERBB2, 1
CDC20	cell division cycle 20
KLK6	kallikrein related peptidase 6
EZH2	enhancer of zeste 2 polycomb repressive complex 2 subunit
ZNF415	zinc finger protein 415
E2F1	E2F transcription factor 1
EXPH5	exophilin 5
TRIM29	tripartite motif containing 29
CENPI	centromere protein I
CSTB	cystatin B
CD36	CD36 molecule
CDK1	cyclin dependent kinase 1
KRT4	keratin 4
MYBL2	MYB proto-oncogene like 2
NASP	nuclear autoantigenic sperm protein
TOP2A	topoisomerase (DNA) II alpha
SLC52A1	solute carrier family 52 member 1
SPRR1B	small proline rich protein 1B
JUNB	JunB proto-oncogene, AP-1 transcription factor subunit
ZNF135	zinc finger protein 135
SPRR2C	small proline rich protein 2C (pseudogene)
EPCAM	epithelial cell adhesion molecule
CAST	calpastatin
MFSD5	major facilitator superfamily domain containing 5
MAPK10	mitogen-activated protein kinase 10
AQP1	aquaporin 1 (Colton blood group)
MXD1	MAX dimerization protein 1
PAMR1	peptidase domain containing associated with muscle regeneration 1
PKP1	plakophilin 1
TPD52L1	tumor protein D52-like 1
FANCG	Fanconi anemia complementation group G
ARPC1B	actin related protein 2/3 complex subunit 1B
MAP4	microtubule associated protein 4
METTL7A	methyltransferase like 7A
FZD1	frizzled class receptor 1
ATAD2	ATPase family, AAA domain containing 2
ZNF750	zinc finger protein 750
PPP1R7	protein phosphatase 1 regulatory subunit 7
TMEM40	transmembrane protein 40
MAP2K4	mitogen-activated protein kinase kinase 4
NAP1L2	nucleosome assembly protein 1 like 2
C1orf116	chromosome 1 open reading frame 116
NCLN	nicalin
DALRD3	DALR anticodon binding domain containing 3
SLC15A3	solute carrier family 15 member 3
ZNF85	zinc finger protein 85
TST	thiosulfate sulfurtransferase
WISP3	WNT1 inducible signaling pathway protein 3
TEF	TEF, PAR bZIP transcription factor
PGGHG	protein-glucosylgalactosylhydroxylysine glucosidase
VAC14	Vac14, PIKFYVE complex component
ARHGAP1	Rho GTPase activating protein 1
LMNA	lamin A/C
FOSB	FosB proto-oncogene, AP-1 transcription factor subunit
SNX3	sorting nexin 3
LRP10	LDL receptor related protein 10
ENO2	enolase 2
DNASE1L3	deoxyribonuclease 1 like 3
MAPRE2	microtubule associated protein RP/EB family member 2
RRM2	ribonucleotide reductase regulatory subunit M2
TIMM8B	translocase of inner mitochondrial membrane 8 homolog B
DNMT1	DNA (cytosine-5-)-methyltransferase 1
UCP2	uncoupling protein 2
RMND5B	required for meiotic nuclear division 5 homolog B
EIF4EBP1	eukaryotic translation initiation factor 4E binding protein 1
ATP13A2	ATPase 13A2
NDEL1	nudE neurodevelopment protein 1 like 1
CENPM	centromere protein M
KATNBL1	katanin regulatory subunit B1 like 1
WARS	tryptophanyl-tRNA synthetase
FEN1	flap structure-specific endonuclease 1
CIDEA	cell death-inducing DFFA-like effector a
MAT2A	methionine adenosyltransferase 2A
PCDH9	protocadherin 9
CDC5L	cell division cycle 5 like
CLIP4	CAP-Gly domain containing linker protein family member 4
CEP55	centrosomal protein 55
BMP4	bone morphogenetic protein 4
TMEM106C	transmembrane protein 106C
FANCI	Fanconi anemia complementation group I
PALMD	palmdelphin
NDRG2	NDRG family member 2
CYP2C9	cytochrome P450 family 2 subfamily C member 9
MIR1908///FADS1	microRNA 1908///fatty acid desaturase 1
CA9	carbonic anhydrase 9
SLC19A2	solute carrier family 19 member 2
ZC4H2	zinc finger C4H2-type containing
GM2A	GM2 ganglioside activator
CHMP2B	charged multivesicular body protein 2B
SLC16A6	solute carrier family 16 member 6
ARHGAP10	Rho GTPase activating protein 10
FAM63A	family with sequence similarity 63 member A
ID4	inhibitor of DNA binding 4, HLH protein
EPB41L4A	erythrocyte membrane protein band 4.1 like 4A
CXCL8	C-X-C motif chemokine ligand 8
DIAPH2	diaphanous related formin 2
CDC25B	cell division cycle 25B
NAAA	N-acylethanolamine acid amidase
PRSS2	protease, serine 2
SC5D	sterol-C5-desaturase
NCOA1	nuclear receptor coactivator 1
TOM1L2	target of myb1 like 2 membrane trafficking protein
IL25	interleukin 25
AGRN	agrin
ZWINT	ZW10 interacting kinetochore protein
CRYL1	crystallin lambda 1
MAGEL2	MAGE family member L2
PLK2	polo like kinase 2
SLC11A2	solute carrier family 11 member 2
SLC35F6///CENPA	solute carrier family 35 member F6///centromere protein A
STX11	syntaxin 11
IL36RN	interleukin 36 receptor antagonist
CYP3A43	cytochrome P450 family 3 subfamily A member 43
SYPL1	synaptophysin like 1
CASZ1	castor zinc finger 1
BIRC5	baculoviral IAP repeat containing 5
ACOX1	acyl-CoA oxidase 1
EML1	echinoderm microtubule associated protein like 1
HEBP2	heme binding protein 2
RAB11A	RAB11A, member RAS oncogene family
CCDC6	coiled-coil domain containing 6
TEAD4	TEA domain transcription factor 4
LMNB1	lamin B1
NPEPPS	aminopeptidase puromycin sensitive
CTNNBIP1	catenin beta interacting protein 1
GOLGA6A	golgin A6 family member A
RAB5A	RAB5A, member RAS oncogene family
AGA	aspartylglucosaminidase
CXCL14	C-X-C motif chemokine ligand 14
SLC25A15	solute carrier family 25 member 15
USP46	ubiquitin specific peptidase 46
HOXC6	homeobox C6
SHC3	SHC adaptor protein 3
SMPD2	sphingomyelin phosphodiesterase 2
CASQ2	calsequestrin 2
KRT6B	keratin 6B
ITM2A	integral membrane protein 2A
WDHD1	WD repeat and HMG-box DNA binding protein 1
ENSA	endosulfine alpha
RPL14	ribosomal protein L14
YPEL5	yippee like 5
SNORD83B///SNORD139///RPL3	small nucleolar RNA, C/D box 83B///small nucleolar RNA, C/D box 139///ribosomal protein L3
PSG2	pregnancy specific beta-1-glycoprotein 2
NDC80	NDC80, kinetochore complex component
TUBA1A	tubulin alpha 1a
CHURC1-FNTB///FNTB	CHURC1-FNTB readthrough///farnesyltransferase, CAAX box, beta
RPL39L	ribosomal protein L39 like
NEBL	nebulette
MIR664B///SNORA56///DKC1	microRNA 664b///small nucleolar RNA, H/ACA box 56///dyskerin pseudouridine synthase 1
MEIS2	Meis homeobox 2
POLD1	DAN polymerase delta 1, catalytic subunit
PTK6	protein tyrosine kinase 6
SPN	sialophorin
RAB25	RAB25, member RAS oncogene family
CENPF	centromere protein F
FANCA	Fanconi anemia complementation group A
SOCS6	suppressor of cytokine signaling 6
OR2F1	olfactory receptor family 2 subfamily F member 1 (gene/pseudogene)
RNASEH2A	ribonuclease H2 subunit A
IL1R2	interleukin 1 receptor type 2
RPS12	ribosomal protein S12
ERLIN1	ER lipid raft associated 1
GAB1	GRB2 associated binding protein 1
VAMP3	vesicle associated membrane protein 3
SLC6A10PB///SLC6A10P///SLC6A8	solute carrier family 6 member 8 pseudogene///solute carrier family 6 member 10, pseudogene///solute carrier family 6 member 8
MAPK14	mitogen-activated protein kinase 14
EFNB2	ephrin B2
LRRFIP2	LRR binding FLII interacting protein 2
MCM4	minichromosome maintenance complex component 4
UBC	ubiquitin C
KRT19	keratin 19
SGK1	serum/glucocorticoid regulated kinase 1
EDNRB	endothelin receptor type B
COL17A1	collagen type XVII alpha 1 chain
TGM1	transglutaminase 1
DDIT4	DNA damage inducible transcript 4
KIAA1109	KIAA1109
CCND1	cyclin D1
SNORD32A///SNORD33///SNORD34///SNORD35A///RPL13A	small nucleolar RNA, C/D box 32A///small nucleolar RNA, C/D box 33///small nucleolar RNA, C/D box 34///small nucleolar RNA, C/D box 35A///ribosomal protein L13a
EPHB2	EPH receptor B2
SMC4	structural maintenance of chromosomes 4
COBLL1	cordon-bleu WH2 repeat protein like 1
LONRF1	LON peptidase N-terminal domain and ring finger 1
PLXNA1	plexin A1
MAFB	MAF bZIP transcription factor B
SYNGR1	synaptogyrin 1
PRC1	protein regulator of cytokinesis 1
ISL1	ISL LIM homeobox 1
PLA2G4B///JMJD7-PLA2G4B	phospholipase A2 group IVB///JMJD7-PLA2G4B readthrough
PEG3	paternally expressed 3
PKNOX2	PBX/knotted 1 homeobox 2
SNX10	sorting nexin 10
FAM189A2	family with sequence similarity 189 member A2
ZNF586	zinc finger protein 586
GDF7	growth differentiation factor 7
FAM8A1	family with sequence similarity 8 member A1
PRRX1	paired related homeobox 1
ACAT1	acetyl-CoA acetyltransferase 1
WNT16	Wnt family member 16
GPR1	G protein-coupled receptor 1
RPS6KA6	ribosomal protein S6 kinase A6
CEP72	centrosomal protein 72
LOC101927180///ATP6V1F	V-type proton ATPase subunit F pseudogene///ATPase H+ transporting V1 subunit F
UTRN	utrophin
ECM1	extracellular matrix protein 1
PELI1	pellino E3 ubiquitin protein ligase 1
DUOX1	dual oxidase 1
CDK2	cyclin dependent kinase 2
SDPR	serum deprivation response
LYN	LYN proto-oncogene, Src family tyrosine kinase
GMNN	geminin, DNA replication inhibitor
PDLIM4	PDZ and LIM domain 4
KLF2	Kruppel like factor 2
ISG20	interferon stimulated exonuclease gene 20
TSPYL1	TSPY like 1
BARX2	BARX homeobox 2
MMP9	matrix metallopeptidase 9
ANO10	anoctamin 10
UBE2E1	ubiquitin conjugating enzyme E2 E1
CXCL12	C-X-C motif chemokine ligand 12
SYT17	synaptotagmin 17
STX17	syntaxin 17
CROT	carnitine O-octanoyltransferase
RPL10A	ribosomal protein L10a
KRT7	keratin 7
PDLIM5	PDZ and LIM domain 5
PYGM	phosphorylase, glycogen, muscle
CCNG2	cyclin G2
CLDN8	claudin 8
LOC100508408///SNORD14B///RPS13	uncharacterized LOC100508408///small nucleolar RNA, C/D box 14B///ribosomal protein S13
BCHE	butyrylcholinesterase
MOSPD1	motile sperm domain containing 1
NPY1R	neuropeptide Y receptor Y1
PRDM2	PR/SET domain 2
VAMP8	vesicle associated membrane protein 8
PITX1	paired like homeodomain 1
SLC23A3///NHEJ1	solute carrier family 23 member 3///non-homologous end joining factor 1
SEPT10	septin 10
COTL1	coactosin like F-actin binding protein 1
STAT1	signal transducer and activator of transcription 1
BNIP3	BCL2 interacting protein 3
LOC101927673///OTUB1	uncharacterized LOC101927673///OTU deubiquitinase, ubiquitin aldehyde binding 1
ZFYVE21	zinc finger FYVE-type containing 21
SLK	STE20 like kinase
SMPDL3A	sphingomyelin phosphodiesterase acid like 3A
TARP	TCR gamma alternate reading frame protein
DUSP14	dual specificity phosphatase 14
DAAM1	dishevelled associated activator of morphogenesis 1
TACC2	transforming acidic coiled-coil containing protein 2
TRPC6	transient receptor potential cation channel subfamily C member 6
LANCL1	LanC like 1
ATP10B	ATPase phospholipid transporting 10B (putative)
MIR4738///H3F3B///H3F3A	microRNA 4738///H3 histone, family 3B///H3 histone, family 3A
SYMPK	symplekin
ATP2C1	ATPase secretory pathway Ca2+ transporting 1
DYNLT3	dynein light chain Tctex-type 3
RPS5	ribosomal protein S5
MPHOSPH9	M-phase phosphoprotein 9
ARHGEF26	Rho guanine nucleotide exchange factor 26
KRT36	keratin 36
ASPM	abnormal spindle microtubule assembly
NLRX1	NLR family member X1
APOL2	apolipoprotein L2
RAB2A	RAB2A, member RAS oncogene family
TSG101	tumor susceptibility 101
TSPAN1	tetraspanin 1
ABR	active BCR-related
PPIC	peptidylprolyl isomerase C
GULP1	GULP, engulfment adaptor PTB domain containing 1
LDOC1	leucine zipper down-regulated in cancer 1
CLEC10A	C-type lectin domain family 10 member A
FGF1	fibroblast growth factor 1
MALL	mal, T-cell differentiation protein like
TMEM45A	transmembrane protein 45A
HOMER2	homer scaffolding protein 2
NEMP1	nuclear envelope integral membrane protein 1
PLOD2	procollagen-lysine,2-oxoglutarate 5-dioxygenase 2
AIM2	absent in melanoma 2
PHACTR2	phosphatase and actin regulator 2
LAPTM4A	lysosomal protein transmembrane 4 alpha
EIF4E2	eukaryotic translation initiation factor 4E family member 2
TMEM43	transmembrane protein 43
PVR	poliovirus receptor
CDCA3	cell division cycle associated 3
ECM2	extracellular matrix protein 2
SLX1B-SULT1A4///SLX1A-SULT1A3///SULT1A4///SULT1A3	SLX1B-SULT1A4 readthrough (NMD candidate)///SLX1A-SULT1A3 readthrough (NMD candidate)///sulfotransferase family 1A member 4///sulfotransferase family 1A member 3
OVOL1	ovo like transcriptional repressor 1
TUBB3	tubulin beta 3 class III
KIAA1614	KIAA1614
UPP1	uridine phosphorylase 1
MKI67	marker of proliferation Ki-67
HBP1	HMG-box transcription factor 1
MYL2	myosin light chain 2
ACOT9	acyl-CoA thioesterase 9
YEATS2	YEATS domain containing 2
PAQR4	progestin and adipoQ receptor family member 4
TMEM246	transmembrane protein 246
LAPTM4B	lysosomal protein transmembrane 4 beta
ELL2	elongation factor for RNA polymerase II 2
CYLD	CYLD lysine 63 deubiquitinase
RIOK3	RIO kinase 3
SCN7A	sodium voltage-gated channel alpha subunit 7
CELSR2	cadherin EGF LAG seven-pass G-type receptor 2
NBEAL2	neurobeachin like 2
SKP1	S-phase kinase-associated protein 1
MAX	MYC associated factor X
HLA-DQB2	major histocompatibility complex, class II, DQ beta 2
DSG3	desmoglein 3
Igk	immunoglobulin kappa chain complex
CLCA2	chloride channel accessory 2
DHRS1	dehydrogenase/reductase 1
RAD51AP1	RAD51 associated protein 1
PLEKHM1	pleckstrin homology and RUN domain containing M1
ZNF91	zinc finger protein 91
SNORD73A///RPS3A	small nucleolar RNA, C/D box 73A///ribosomal protein S3A
IFNA10	interferon alpha 10
PROS1	protein S (alpha)
ARHGEF10L	Rho guanine nucleotide exchange factor 10 like
MAF	MAF bZIP transcription factor
ABCA5	ATP binding cassette subfamily A member 5
DDN	dendrin
ACTR1A	ARP1 actin-related protein 1 homolog A, centractin alpha
CD4	CD4 molecule
ACOX3	acyl-CoA oxidase 3, pristanoyl
ADRA1D	adrenoceptor alpha 1D
TRIO	trio Rho guanine nucleotide exchange factor
DHFR	dihydrofolate reductase
CUL3	cullin 3
DNM3	dynamin 3
EGR1	early growth response 1
CEACAM7	carcinoembryonic antigen related cell adhesion molecule 7
ELMO2	engulfment and cell motility 2
DPYS	dihydropyrimidinase
ALDH3A2	aldehyde dehydrogenase 3 family member A2
BDKRB2	bradykinin receptor B2
SEPT5-GP1BB///SEPT5///GP1BB	SEPT5-GP1BB readthrough///septin 5///glycoprotein Ib platelet beta subunit
SULT1A1	sulfotransferase family 1A member 1
MTHFD2	methylenetetrahydrofolate dehydrogenase (NADP+ dependent) 2, methenyltetrahydrofolate cyclohydrolase
ASAH1	N-acylsphingosine amidohydrolase 1
SCAMP1	secretory carrier membrane protein 1
LAD1	ladinin 1
C5orf66	chromosome 5 open reading frame 66
PCDHGA1///PCDHGA2///PCDHGA3///PCDHGA4///PCDHGA5///PCDHGA6///PCDHGA7///PCDHGA9///PCDHGA10///PCDHGA11///PCDHGB1///PCDHGB2///PCDHGB3///PCDHGB5///PCDHGB6///PCDHGB7///PCDHGC4///PCDHGC5///PCDHGA12///PCDHGA8///PCDHGB4///PCDHGC3	protocadherin gamma subfamily A, 1///protocadherin gamma subfamily A, 2///protocadherin gamma subfamily A, 3///protocadherin gamma subfamily A, 4///protocadherin gamma subfamily A, 5///protocadherin gamma subfamily A, 6///protocadherin gamma subfamily A, 7///protocadherin gamma subfamily A, 9///protocadherin gamma subfamily A, 10///protocadherin gamma subfamily A, 11///protocadherin gamma subfami…
PCDHGA3	protocadherin gamma subfamily A, 3
PERP	PERP, TP53 apoptosis effector
AHNAK2	AHNAK nucleoprotein 2
POLQ	DNA polymerase theta
C4orf46///TOMM7	chromosome 4 open reading frame 46///translocase of outer mitochondrial membrane 7
GFRA3	GDNF family receptor alpha 3
TACSTD2	tumor-associated calcium signal transducer 2
ETFDH	electron transfer flavoprotein dehydrogenase
CIRBP	cold inducible RNA binding protein
IPO9	importin 9
GINS4	GINS complex subunit 4
MIPEP	mitochondrial intermediate peptidase
DUSP22	dual specificity phosphatase 22
MUC5B	mucin 5B, oligomeric mucus/gel-forming
SMPD1	sphingomyelin phosphodiesterase 1
MARCKSL1	MARCKS like 1
NMRK1	nicotinamide riboside kinase 1
ZNF426	zinc finger protein 426
YWHAZ	tyrosine 3-monooxygenase/tryptophan 5-monooxygenase activation protein zeta
STX12	syntaxin 12
DCTN5	dynactin subunit 5
SLC8B1	solute carrier family 8 member B1
MBNL2	muscleblind like splicing regulator 2
ESRRB	estrogen related receptor beta
TECR	trans-2,3-enoyl-CoA reductase
KLK7	kallikrein related peptidase 7
USO1	USO1 vesicle transport factor
MIR8071-2///MIR8071-1///IGHV4-31///IGHM///IGHG2///IGHG1	microRNA 8071-2///microRNA 8071-1///immunoglobulin heavy variable 4-31///immunoglobulin heavy constant mu///immunoglobulin heavy constant gamma 2 (G2m marker)///immunoglobulin heavy constant gamma 1 (G1m marker)
WISP2	WNT1 inducible signaling pathway protein 2
ARG2	arginase 2
KIAA0232	KIAA0232
CST6	cystatin E/M
SLC6A4	solute carrier family 6 member 4
PLAGL1	PLAG1 like zinc finger 1
RNF123	ring finger protein 123
TGFBR3	transforming growth factor beta receptor 3
SNRK	SNF related kinase
CDC45	cell division cycle 45
MIOS	meiosis regulator for oocyte development
FXYD1	FXYD domain containing ion transport regulator 1
ITPR1	inositol 1,4,5-trisphosphate receptor type 1
SIRT6	sirtuin 6
TSPAN15	tetraspanin 15
CALM1	calmodulin 1
TP53TG1	TP53 target 1 (non-protein coding)
RPP25	ribonuclease P/MRP subunit p25
ARL4D	ADP ribosylation factor like GTPase 4D
GUSB	glucuronidase beta
BCAP29	B-cell receptor-associated protein 29
FGFBP1	fibroblast growth factor binding protein 1
NAT6	N-acetyltransferase 6
SLC9A1	solute carrier family 9 member A1
VPS13B	vacuolar protein sorting 13 homolog B
LRRN2	leucine rich repeat neuronal 2
RPL21P28///SNORA27///SNORD102///RPL21	ribosomal protein L21 pseudogene 28///small nucleolar RNA, H/ACA box 27///small nucleolar RNA, C/D box 102///ribosomal protein L21
MN1	MN1 proto-oncogene, transcriptional regulator
PRNP	prion protein
ZBTB7B	zinc finger and BTB domain containing 7B
EML3	echinoderm microtubule associated protein like 3
CAPN7	calpain 7
ZNF816-ZNF321P///ZNF816	ZNF816-ZNF321P readthrough///zinc finger protein 816
ADCY1	adenylate cyclase 1
ADA	adenosine deaminase
DUSP2	dual specificity phosphatase 2
PGM5	phosphoglucomutase 5
ISOC1	isochorismatase domain containing 1
FAM162A	family with sequence similarity 162 member A
RPS14	ribosomal protein S14
IL6ST	interleukin 6 signal transducer
THRB	thyroid hormone receptor beta
CENPN	centromere protein N
GTF3C1	general transcription factor IIIC subunit 1
ZNF43	zinc finger protein 43
RBP3	retinol binding protein 3
KRT3	keratin 3
NOTCH2	notch 2
KLHL18	kelch like family member 18
SMC1A	structural maintenance of chromosomes 1A
ACSL1	acyl-CoA synthetase long-chain family member 1
IDO1	indoleamine 2,3-dioxygenase 1
HAUS5	HAUS augmin like complex subunit 5
CEACAM1	carcinoembryonic antigen related cell adhesion molecule 1
EIF4E	eukaryotic translation initiation factor 4E
RPS9	ribosomal protein S9
SNORD14D///SNORD14C///HSPA8	small nucleolar RNA, C/D box 14D///small nucleolar RNA, C/D box 14C///heat shock protein family A (Hsp70) member 8
TUBA4A	tubulin alpha 4a
ACVR1B	activin A receptor type 1B
ARRB1	arrestin beta 1
CEP152	centrosomal protein 152
MLF1	myeloid leukemia factor 1
C21orf33	chromosome 21 open reading frame 33
CD44	CD44 molecule (Indian blood group)
PTGIS	prostaglandin I2 (prostacyclin) synthase
LOC440434	aminopeptidase puromycin sensitive pseudogene
KIF20A	kinesin family member 20A
RHOD	ras homolog family member D
ELOVL6	ELOVL fatty acid elongase 6
CLCNKB	chloride voltage-gated channel Kb
H2AFX	H2A histone family member X
LAMTOR3	late endosomal/lysosomal adaptor, MAPK and MTOR activator 3
DSP	desmoplakin
CYP2A7	cytochrome P450 family 2 subfamily A member 7
STIL	SCL/TAL1 interrupting locus
JMJD7///JMJD7-PLA2G4B	jumonji domain containing 7///JMJD7-PLA2G4B readthrough
HLF	HLF, PAR bZIP transcription factor
AKR1B10	aldo-keto reductase family 1 member B10
MMP7	matrix metallopeptidase 7
PAQR5	progestin and adipoQ receptor family member 5
RHBDF1	rhomboid 5 homolog 1
CSNK1A1	casein kinase 1 alpha 1
ADGRL2	adhesion G protein-coupled receptor L2
CFB	complement factor B
MDK	midkine (neurite growth-promoting factor 2)
FBXO3	F-box protein 3
S100A9	S100 calcium binding protein A9
CCNB2	cyclin B2
ADAM8	ADAM metallopeptidase domain 8
CLDN4	claudin 4
SCNN1G	sodium channel epithelial 1 gamma subunit
ABHD6	abhydrolase domain containing 6
ACTB	actin beta
MAP1LC3B	microtubule associated protein 1 light chain 3 beta
FAS	Fas cell surface death receptor
MDFIC	MyoD family inhibitor domain containing
CKS1B	CDC28 protein kinase regulatory subunit 1B
ATP13A3	ATPase 13A3
CMAS	cytidine monophosphate N-acetylneuraminic acid synthetase
KCTD17	potassium channel tetramerization domain containing 17
GLYAT	glycine-N-acyltransferase
ASF1B	anti-silencing function 1B histone chaperone
LRRFIP1	LRR binding FLII interacting protein 1
TPMT	thiopurine S-methyltransferase
SERPINB2	serpin family B member 2
SP3P	Sp3 transcription factor pseudogene
MYD88	myeloid differentiation primary response 88
CDK10	cyclin dependent kinase 10
SNORD24///SNORD36A///SNORD36B///RPL7A	small nucleolar RNA, C/D box 24///small nucleolar RNA, C/D box 36A///small nucleolar RNA, C/D box 36B///ribosomal protein L7a
KIFC1	kinesin family member C1
TBC1D2B	TBC1 domain family member 2B
ECHDC2	enoyl-CoA hydratase domain containing 2
PSMC3IP	PSMC3 interacting protein
DSCC1	DNA replication and sister chromatid cohesion 1
RIBC2	RIB43A domain with coiled-coils 2
NCAPG2	non-SMC condensin II complex subunit G2
ZNF254	zinc finger protein 254
SLCO1B1	solute carrier organic anion transporter family member 1B1
ADGRG3	adhesion G protein-coupled receptor G3
SH3BP5	SH3 domain binding protein 5
BUB1	BUB1 mitotic checkpoint serine/threonine kinase
HSPB1	heat shock protein family B (small) member 1
ARL4A	ADP ribosylation factor like GTPase 4A
STX7	syntaxin 7
NDUFB8	NADH:ubiquinone oxidoreductase subunit B8
NDN	necdin, MAGE family member
SLC9A3R1	SLC9A3 regulator 1
CD1E	CD1e molecule
BRCA1	BRCA1, DNA repair associated
KRT18	keratin 18
DSC1	desmocollin 1
CNPY3	canopy FGF signaling regulator 3
SCUBE2	signal peptide, CUB domain and EGF like domain containing 2
HJURP	Holliday junction recognition protein
MCM3	minichromosome maintenance complex component 3
SGMS1	sphingomyelin synthase 1
ZFAND5	zinc finger AN1-type containing 5
CRISP2	cysteine rich secretory protein 2
GUSBP3///SMA5///SMA4	glucuronidase, beta pseudogene 3///glucuronidase beta pseudogene///glucuronidase beta pseudogene
RALB	RALB Ras like proto-oncogene B
ANP32E	acidic nuclear phosphoprotein 32 family member E
GIGYF2	GRB10 interacting GYF protein 2
P3H4	prolyl 3-hydroxylase family member 4 (non-enzymatic)
ATP6V1D	ATPase H+ transporting V1 subunit D
IGHM	immunoglobulin heavy constant mu
OSBPL1A	oxysterol binding protein like 1A
KRT8	keratin 8
KLF8	Kruppel like factor 8
OCM2	oncomodulin 2
EMCN	endomucin
ASPA	aspartoacylase
GJA9-MYCBP///GJA9///MYCBP	GJA9-MYCBP readthrough///gap junction protein alpha 9///MYC binding protein
CYP39A1	cytochrome P450 family 39 subfamily A member 1
DLGAP5	DLG associated protein 5
NLRP1	NLR family pyrin domain containing 1
SNORD68///RPL13	small nucleolar RNA, C/D box 68///ribosomal protein L13
EIF5	eukaryotic translation initiation factor 5
MYL3	myosin light chain 3
MCM10	minichromosome maintenance 10 replication initiation factor
PPIF	peptidylprolyl isomerase F
ZNF770	zinc finger protein 770
TIAM1	T-cell lymphoma invasion and metastasis 1
RYR1	ryanodine receptor 1
DUSP7	dual specificity phosphatase 7
ORC6	origin recognition complex subunit 6
TOPBP1	topoisomerase (DNA) II binding protein 1
DAPK1	death associated protein kinase 1
BAIAP2	BAI1 associated protein 2
AGPAT3	1-acylglycerol-3-phosphate O-acyltransferase 3
MAP3K1	mitogen-activated protein kinase kinase kinase 1
PCDHB11	protocadherin beta 11
TMED3	transmembrane p24 trafficking protein 3
MNAT1	MNAT1, CDK activating kinase assembly factor
DKK4	dickkopf WNT signaling pathway inhibitor 4
CLSTN3	calsyntenin 3
LLGL1	LLGL1, scribble cell polarity complex component
USP18	ubiquitin specific peptidase 18
PHLDA1	pleckstrin homology like domain family A member 1
RPL15	ribosomal protein L15
ZNF350	zinc finger protein 350
CACNA2D3	calcium voltage-gated channel auxiliary subunit alpha2delta 3
EZR	ezrin
MFSD7	major facilitator superfamily domain containing 7
CUX1	cut like homeobox 1
WRAP73	WD repeat containing, antisense to TP73
NUSAP1	nucleolar and spindle associated protein 1
EXO1	exonuclease 1
TYRO3	TYRO3 protein tyrosine kinase
RARG	retinoic acid receptor gamma
HPSE2	heparanase 2 (inactive)
LOC220077	dedicator of cytokinesis 1 pseudogene
SEMA3F	semaphorin 3F
JUN	Jun proto-oncogene, AP-1 transcription factor subunit
GMPS	guanine monophosphate synthase
HFE	hemochromatosis
MPST	mercaptopyruvate sulfurtransferase
ZNF729///ZNF43	zinc finger protein 729///zinc finger protein 43
OMD	osteomodulin
UBE2D4	ubiquitin conjugating enzyme E2 D4 (putative)
TBC1D3P1-DHX40P1///RNFT1	TBC1D3P1-DHX40P1 readthrough, transcribed pseudogene///ring finger protein, transmembrane 1
NCK2	NCK adaptor protein 2
KIF23	kinesin family member 23
TM4SF1	transmembrane 4 L six family member 1
CSTA	cystatin A
PCNA	proliferating cell nuclear antigen
DNAJB6	DnaJ heat shock protein family (Hsp40) member B6
CASP1	caspase 1
UBE2G1	ubiquitin conjugating enzyme E2 G1
RAB15	RAB15, member RAS oncogene family
MAOB	monoamine oxidase B
TNS1	tensin 1
ITM2B	integral membrane protein 2B
AGO4	argonaute 4, RISC catalytic component
EPHB6	EPH receptor B6
IER3	immediate early response 3
HMGCS1	3-hydroxy-3-methylglutaryl-CoA synthase 1
EFNA5	ephrin A5
PTPRN	protein tyrosine phosphatase, receptor type N
RING1	ring finger protein 1
PI3	peptidase inhibitor 3
FAM102A	family with sequence similarity 102 member A
FAM114A1	family with sequence similarity 114 member A1
CRTC1	CREB regulated transcription coactivator 1
POLE	DNA polymerase epsilon, catalytic subunit
SLCO2A1	solute carrier organic anion transporter family member 2A1
FYCO1	FYVE and coiled-coil domain containing 1
IFI6	interferon alpha inducible protein 6
IL12RB2	interleukin 12 receptor subunit beta 2
MSMO1	methylsterol monooxygenase 1
BRCA2	BRCA2, DNA repair associated
IDE	insulin degrading enzyme
TTK	TTK protein kinase
MIR4800///MXD4	microRNA 4800///MAX dimerization protein 4
MUC8	mucin 8
ITGA3	integrin subunit alpha 3
CENPE	centromere protein E
LAMP1	lysosomal associated membrane protein 1
SNX19	sorting nexin 19
SLC31A2	solute carrier family 31 member 2
ZNF117	zinc finger protein 117
PLA2G3	phospholipase A2 group III
SLC15A1	solute carrier family 15 member 1
DIO2	deiodinase, iodothyronine, type II
LPCAT1	lysophosphatidylcholine acyltransferase 1
COMMD8	COMM domain containing 8
MTHFD1	methylenetetrahydrofolate dehydrogenase, cyclohydrolase and formyltetrahydrofolate synthetase 1
FAIM2	Fas apoptotic inhibitory molecule 2
KLF10	Kruppel like factor 10
ABCA8	ATP binding cassette subfamily A member 8
EPHA2	EPH receptor A2
HAUS7	HAUS augmin like complex subunit 7
CTDSPL	CTD small phosphatase like
LOC101928826///TPT1	uncharacterized LOC101928826///tumor protein, translationally-controlled 1
SLC7A8	solute carrier family 7 member 8
RPL22	ribosomal protein L22
PODXL2	podocalyxin like 2
DCTN3	dynactin subunit 3
NSDHL	NAD(P) dependent steroid dehydrogenase-like
LRRC20	leucine rich repeat containing 20
TWF1	twinfilin actin binding protein 1
DNA2	DNA replication helicase/nuclease 2
SIT1	signaling threshold regulating transmembrane adaptor 1
EEA1	early endosome antigen 1
CD9	CD9 molecule
NCOA2	nuclear receptor coactivator 2
VSNL1	visinin like 1
PER2	period circadian clock 2
SRSF8	serine and arginine rich splicing factor 8
TPM4	tropomyosin 4
DHRS7	dehydrogenase/reductase 7
MOS	v-mos Moloney murine sarcoma viral oncogene homolog
NR1D1///THRA	nuclear receptor subfamily 1 group D member 1///thyroid hormone receptor, alpha
CDH3	cadherin 3
KLK5	kallikrein related peptidase 5
MFNG	MFNG O-fucosylpeptide 3-beta-N-acetylglucosaminyltransferase
ECHDC3	enoyl-CoA hydratase domain containing 3
NOVA1	NOVA alternative splicing regulator 1
PLXNB1	plexin B1
NTF3	neurotrophin 3
MAST4	microtubule associated serine/threonine kinase family member 4
DPT	dermatopontin
NMU	neuromedin U
PGBD5	piggyBac transposable element derived 5
ACSM5	acyl-CoA synthetase medium-chain family member 5
EFNB3	ephrin B3
MUC16	mucin 16, cell surface associated
PAIP2B	poly(A) binding protein interacting protein 2B
SPACA9	sperm acrosome associated 9
RFC3	replication factor C subunit 3
UST	uronyl 2-sulfotransferase
CDKN2C	cyclin dependent kinase inhibitor 2C
ESRP1	epithelial splicing regulatory protein 1
CORO7	coronin 7
PSG11///PSG3	pregnancy specific beta-1-glycoprotein 11///pregnancy specific beta-1-glycoprotein 3
ARMCX1	armadillo repeat containing, X-linked 1
F10	coagulation factor X
CHKA	choline kinase alpha
NTRK2	neurotrophic receptor tyrosine kinase 2
CRYBG3	crystallin beta-gamma domain containing 3
PRDM1	PR/SET domain 1
IGF1	insulin like growth factor 1
RACGAP1	Rac GTPase activating protein 1
ABI3BP	ABI family member 3 binding protein
ELOVL4	ELOVL fatty acid elongase 4
TMEM97	transmembrane protein 97
RFX2	regulatory factor X2
SPON1	spondin 1
SLC39A9	solute carrier family 39 member 9
DPEP1	dipeptidase 1 (renal)
TAAR5	trace amine associated receptor 5
DONSON	downstream neighbor of SON
ZNF835	zinc finger protein 835
AP3B1	adaptor related protein complex 3 beta 1 subunit
IGFBP3	insulin like growth factor binding protein 3
EPHB3	EPH receptor B3
GPATCH4	G-patch domain containing 4
NBPF25P///NBPF26///NBPF19///NBPF20///NBPF10///NBPF8///NBPF9///NBPF15///NBPF11///NBPF14	neuroblastoma breakpoint family member 25, pseudogene///neuroblastoma breakpoint family member 26///neuroblastoma breakpoint family member 19///neuroblastoma breakpoint family member 20///neuroblastoma breakpoint family member 10///neuroblastoma breakpoint family member 8///neuroblastoma breakpoint family member 9///neuroblastoma breakpoint family member 15///neuroblastoma breakpoint family membe…
DCTPP1	dCTP pyrophosphatase 1
RASAL2	RAS protein activator like 2
HADHA	hydroxyacyl-CoA dehydrogenase/3-ketoacyl-CoA thiolase/enoyl-CoA hydratase (trifunctional protein), alpha subunit
PCDHGA9	protocadherin gamma subfamily A, 9
RANBP2	RAN binding protein 2
SDHA	succinate dehydrogenase complex flavoprotein subunit A
KCTD7///RABGEF1	potassium channel tetramerization domain containing 7///RAB guanine nucleotide exchange factor 1
NFATC4	nuclear factor of activated T-cells 4
SMARCD3	SWI/SNF related, matrix associated, actin dependent regulator of chromatin, subfamily d, member 3
ORMDL2	ORMDL sphingolipid biosynthesis regulator 2
DLGAP2	DLG associated protein 2
TRHDE	thyrotropin releasing hormone degrading enzyme
LOC100506718///FLRT2	uncharacterized LOC100506718///fibronectin leucine rich transmembrane protein 2
MECOM	MDS1 and EVI1 complex locus
RAI2	retinoic acid induced 2
NPTXR	neuronal pentraxin receptor
CALCOCO2	calcium binding and coiled-coil domain 2
DDX28	DEAD-box helicase 28
ERI3	ERI1 exoribonuclease family member 3
SELP	selectin P
DSTNP2	destrin, actin depolymerizing factor pseudogene 2
E2F3	E2F transcription factor 3
HLA-F-AS1	HLA-F antisense RNA 1
ADCK2	aarF domain containing kinase 2
P4HB	prolyl 4-hydroxylase subunit beta
ATP4A	ATPase H+/K+ transporting alpha subunit
PPDPF	pancreatic progenitor cell differentiation and proliferation factor
DNAJB4	DnaJ heat shock protein family (Hsp40) member B4
SLC6A12	solute carrier family 6 member 12
GRPEL1	GrpE like 1, mitochondrial
RNF10	ring finger protein 10
KRT83	keratin 83
RORA	RAR related orphan receptor A
RMND5A	required for meiotic nuclear division 5 homolog A
RMI1	RecQ mediated genome instability 1
GID8	GID complex subunit 8 homolog
ACSS3	acyl-CoA synthetase short-chain family member 3
DLG2	discs large MAGUK scaffold protein 2
JAK2	Janus kinase 2
NCAPG	non-SMC condensin I complex subunit G
SORD	sorbitol dehydrogenase
SLC4A7	solute carrier family 4 member 7
EXOC1	exocyst complex component 1
SLX1A///SLX1B	SLX1 homolog A, structure-specific endonuclease subunit///SLX1 homolog B, structure-specific endonuclease subunit
ENTPD6	ectonucleoside triphosphate diphosphohydrolase 6 (putative)
PREPL	prolyl endopeptidase-like
PARP1	poly(ADP-ribose) polymerase 1
DOCK9	dedicator of cytokinesis 9
FABP5	fatty acid binding protein 5
ALDOC	aldolase, fructose-bisphosphate C
ATP5L	ATP synthase, H+ transporting, mitochondrial Fo complex subunit G
PEX7	peroxisomal biogenesis factor 7
FN1	fibronectin 1
EDA2R	ectodysplasin A2 receptor
ZNF253	zinc finger protein 253
CERS4	ceramide synthase 4
PEX3	peroxisomal biogenesis factor 3
TUFT1	tuftelin 1
PLPP1	phospholipid phosphatase 1
RAD51	RAD51 recombinase
MISP	mitotic spindle positioning
DTNA	dystrobrevin alpha
SEMA4A	semaphorin 4A
TNXB///TNXA	tenascin XB///tenascin XA (pseudogene)
MED16	mediator complex subunit 16
LOC100294033///TCAF1	protein FAM115A-like///TRPM8 channel associated factor 1
NR3C1	nuclear receptor subfamily 3 group C member 1
SS18L2	SS18 like 2
EGR3	early growth response 3
DEF8	differentially expressed in FDCP 8 homolog
C12orf29	chromosome 12 open reading frame 29
SHCBP1	SHC binding and spindle associated 1
GRIP2	glutamate receptor interacting protein 2
TRMU///GTSE1	tRNA 5-methylaminomethyl-2-thiouridylate methyltransferase///G2 and S-phase expressed 1
CTSZ	cathepsin Z
CD69	CD69 molecule
IFI44L	interferon induced protein 44 like
DRAP1	DR1 associated protein 1
AKAP9	A-kinase anchoring protein 9
CDC7	cell division cycle 7
IL17A	interleukin 17A
MAGI1	membrane associated guanylate kinase, WW and PDZ domain containing 1
COL14A1	collagen type XIV alpha 1 chain
SSBP2	single stranded DNA binding protein 2
SRSF5	serine and arginine rich splicing factor 5
F11	coagulation factor XI
SEPT8	septin 8
RPLP0	ribosomal protein lateral stalk subunit P0
PSMB2	proteasome subunit beta 2
GPATCH3	G-patch domain containing 3
PLK1	polo like kinase 1
PTS	6-pyruvoyltetrahydropterin synthase
MPRIP	myosin phosphatase Rho interacting protein
IL20RA	interleukin 20 receptor subunit alpha
RXFP3	relaxin/insulin like family peptide receptor 3
TVP23B	trans-golgi network vesicle protein 23 homolog B (S. cerevisiae)
DKK2	dickkopf WNT signaling pathway inhibitor 2
PMFBP1	polyamine modulated factor 1 binding protein 1
IHH	indian hedgehog
AMD1	adenosylmethionine decarboxylase 1
TGFA	transforming growth factor alpha
POLA1	DNA polymerase alpha 1, catalytic subunit
LRBA	LPS responsive beige-like anchor protein
RHAG	Rh-associated glycoprotein
PLCB2	phospholipase C beta 2
LIAS	lipoic acid synthetase
P2RY1	purinergic receptor P2Y1
MIR6890///QARS	microRNA 6890///glutaminyl-tRNA synthetase
HIPK2	homeodomain interacting protein kinase 2
ABCA6	ATP binding cassette subfamily A member 6
CYB561	cytochrome b561
PCDHA2///PCDHA3	protocadherin alpha 2///protocadherin alpha 3
SFTPC	surfactant protein C
MID2	midline 2
TRAPPC2B///TRAPPC2	trafficking protein particle complex 2B///trafficking protein particle complex 2
OXSR1	oxidative stress responsive 1
PPM1G	protein phosphatase, Mg2+/Mn2+ dependent 1G
HMMR	hyaluronan mediated motility receptor
SRP72	signal recognition particle 72
MOSPD2	motile sperm domain containing 2
ZNF134	zinc finger protein 134
CCNA2	cyclin A2
DMXL1	Dmx like 1
LAMP2	lysosomal associated membrane protein 2
LGALS7B///LGALS7	galectin 7B///galectin 7
CCR1	C-C motif chemokine receptor 1
KLRD1	killer cell lectin like receptor D1
CCNE1	cyclin E1
TSPAN31	tetraspanin 31
WHSC1L1	Wolf-Hirschhorn syndrome candidate 1-like 1
IQGAP1	IQ motif containing GTPase activating protein 1
LONP1	lon peptidase 1, mitochondrial
DPP3	dipeptidyl peptidase 3
KCNAB1	potassium voltage-gated channel subfamily A member regulatory beta subunit 1
POF1B	premature ovarian failure, 1B
XYLT2	xylosyltransferase 2
BAG3	BCL2 associated athanogene 3
FMO2	flavin containing monooxygenase 2
GGA3	golgi associated, gamma adaptin ear containing, ARF binding protein 3
CD1A	CD1a molecule
EMC9	ER membrane protein complex subunit 9
COL6A1	collagen type VI alpha 1 chain
WBP4	WW domain binding protein 4
NR0B1	nuclear receptor subfamily 0 group B member 1
DHRS12	dehydrogenase/reductase 12
UQCR11	ubiquinol-cytochrome c reductase, complex III subunit XI
F8A3///F8A2///F8A1	coagulation factor VIII-associated 3///coagulation factor VIII-associated 2///coagulation factor VIII-associated 1
KCTD20	potassium channel tetramerization domain containing 20
OAS3	2'-5'-oligoadenylate synthetase 3
UBE2B	ubiquitin conjugating enzyme E2 B
SMO	smoothened, frizzled class receptor
FNBP1	formin binding protein 1
ARPC2	actin related protein 2/3 complex subunit 2
BEAN1	brain expressed, associated with NEDD4, 1
RAPGEFL1	Rap guanine nucleotide exchange factor like 1
CKS2	CDC28 protein kinase regulatory subunit 2
CFHR1///CFH	complement factor H related 1///complement factor H
UEVLD	UEV and lactate/malate dehyrogenase domains
ENOX1	ecto-NOX disulfide-thiol exchanger 1
POLR1D	RNA polymerase I subunit D
OR1E2///OR1E1	olfactory receptor family 1 subfamily E member 2///olfactory receptor family 1 subfamily E member 1
SKP2	S-phase kinase-associated protein 2, E3 ubiquitin protein ligase
ERBB2	erb-b2 receptor tyrosine kinase 2
EPHX2	epoxide hydrolase 2
NDST1	N-deacetylase and N-sulfotransferase 1
NEDD4L	neural precursor cell expressed, developmentally down-regulated 4-like, E3 ubiquitin protein ligase
CARD14	caspase recruitment domain family member 14
BICDL1	BICD family like cargo adaptor 1
PALLD	palladin, cytoskeletal associated protein
DEFB4B///DEFB4A	defensin beta 4B///defensin beta 4A
UBE2S	ubiquitin conjugating enzyme E2 S
PRKDC	protein kinase, DNA-activated, catalytic polypeptide
IPPK	inositol-pentakisphosphate 2-kinase
ANGPTL8	angiopoietin like 8
SOX4	SRY-box 4
CCSER2	coiled-coil serine rich protein 2
FUT8	fucosyltransferase 8
RRAGD	Ras related GTP binding D
EFNA1	ephrin A1
FGF22	fibroblast growth factor 22
PCSK5	proprotein convertase subtilisin/kexin type 5
MYC	v-myc avian myelocytomatosis viral oncogene homolog
AOX1	aldehyde oxidase 1
ZSWIM8	zinc finger SWIM-type containing 8
TNNT1	troponin T1, slow skeletal type
CRELD1	cysteine rich with EGF like domains 1
TYK2	tyrosine kinase 2
AQP3	aquaporin 3 (Gill blood group)
NRBP1	nuclear receptor binding protein 1
JUP	junction plakoglobin
TBC1D9B	TBC1 domain family member 9B
MSLN	mesothelin
PPP1R15A	protein phosphatase 1 regulatory subunit 15A
UGP2	UDP-glucose pyrophosphorylase 2
SCP2	sterol carrier protein 2
TGFBI	transforming growth factor beta induced
MMP3	matrix metallopeptidase 3
PDIA4	protein disulfide isomerase family A member 4
UFL1	UFM1 specific ligase 1
LMF1	lipase maturation factor 1
CHL1	cell adhesion molecule L1 like
MCL1	BCL2 family apoptosis regulator
CXCR3	C-X-C motif chemokine receptor 3
HNF4A	hepatocyte nuclear factor 4 alpha
ASAP3	ArfGAP with SH3 domain, ankyrin repeat and PH domain 3
CAD	carbamoyl-phosphate synthetase 2, aspartate transcarbamylase, and dihydroorotase
TSC22D2	TSC22 domain family member 2
DOK4	docking protein 4
AIM1L	absent in melanoma 1-like
BTG2	BTG anti-proliferation factor 2
ARF5	ADP ribosylation factor 5
KIF11	kinesin family member 11
TBC1D5	TBC1 domain family member 5
SMS	spermine synthase
MEST	mesoderm specific transcript
EIF2AK2	eukaryotic translation initiation factor 2 alpha kinase 2
SLC16A7	solute carrier family 16 member 7
BTRC	beta-transducin repeat containing E3 ubiquitin protein ligase
NDUFC1	NADH:ubiquinone oxidoreductase subunit C1
REEP5	receptor accessory protein 5
SARS	seryl-tRNA synthetase
ALDH3B2	aldehyde dehydrogenase 3 family member B2
BNIP1	BCL2 interacting protein 1
ARPC4-TTLL3///ARPC4	ARPC4-TTLL3 readthrough///actin related protein 2/3 complex subunit 4
WDR1	WD repeat domain 1
2023-03-07	membrane associated ring-CH-type finger 7
CCNB1	cyclin B1
SLC30A9	solute carrier family 30 member 9
RPL9	ribosomal protein L9
VOPP1	vesicular, overexpressed in cancer, prosurvival protein 1
KRT76	keratin 76
WDR76	WD repeat domain 76
CKM	creatine kinase, M-type
LYRM1	LYR motif containing 1
RPS10	ribosomal protein S10
FAXDC2	fatty acid hydroxylase domain containing 2
UMOD	uromodulin
PLBD1	phospholipase B domain containing 1
ADD1	adducin 1
CYP3A4	cytochrome P450 family 3 subfamily A member 4
RTN4	reticulon 4
NOL12///TRIOBP	nucleolar protein 12///TRIO and F-actin binding protein
CPA4	carboxypeptidase A4
NDUFB2	NADH:ubiquinone oxidoreductase subunit B2
HCFC2	host cell factor C2
CD40	CD40 molecule
SNORD10///SNORA48///SNORA67///EIF4A1	small nucleolar RNA, C/D box 10///small nucleolar RNA, H/ACA box 48///small nucleolar RNA, H/ACA box 67///eukaryotic translation initiation factor 4A1
CLINT1	clathrin interactor 1
HDAC5	histone deacetylase 5
LOC101929356///ARL5A	uncharacterized LOC101929356///ADP ribosylation factor like GTPase 5A
FGF7	fibroblast growth factor 7
MROH7	maestro heat like repeat family member 7
EGFR	epidermal growth factor receptor
MMP24-AS1	MMP24 antisense RNA 1
MEGF9	multiple EGF like domains 9
MINOS1-NBL1///NBL1	MINOS1-NBL1 readthrough///neuroblastoma 1, DAN family BMP antagonist
FAM107A	family with sequence similarity 107 member A
PIK3R3	phosphoinositide-3-kinase regulatory subunit 3
FBXL7	F-box and leucine rich repeat protein 7
ANGPT2	angiopoietin 2
SBNO2	strawberry notch homolog 2
CDK4	cyclin dependent kinase 4
CDHR1	cadherin related family member 1
LOC101928625///MED21	uncharacterized LOC101928625///mediator complex subunit 21
CETN3	centrin 3
TCL6	T-cell leukemia/lymphoma 6 (non-protein coding)
GSDMD	gasdermin D
LOC101928635///ALDH1A2	uncharacterized LOC101928635///aldehyde dehydrogenase 1 family member A2
GSTA1	glutathione S-transferase alpha 1
BIRC3	baculoviral IAP repeat containing 3
ZNF493	zinc finger protein 493
SLC13A4	solute carrier family 13 member 4
RPS25	ribosomal protein S25
COL10A1	collagen type X alpha 1 chain
CD59	CD59 molecule
ZNF132	zinc finger protein 132
KDM6B	lysine demethylase 6B
ANXA9	annexin A9
C18orf25	chromosome 18 open reading frame 25
BHLHE40	basic helix-loop-helix family member e40
SDHD	succinate dehydrogenase complex subunit D
LOC100506504	uncharacterized LOC100506504
WNT4	Wnt family member 4
GPX5	glutathione peroxidase 5
SETDB1	SET domain bifurcated 1
MAML3	mastermind like transcriptional coactivator 3
RFWD3	ring finger and WD repeat domain 3
GLRX3	glutaredoxin 3
DGKD	diacylglycerol kinase delta
P2RX5-TAX1BP3///TAX1BP3///P2RX5	P2RX5-TAX1BP3 readthrough (NMD candidate)///Tax1 binding protein 3///purinergic receptor P2X 5
SLC11A1	solute carrier family 11 member 1
PPFIBP2	PPFIA binding protein 2
TUBB4B	tubulin beta 4B class IVb
DNAH9	dynein axonemal heavy chain 9
AMBP	alpha-1-microglobulin/bikunin precursor
TDRKH	tudor and KH domain containing
PIK3R1	phosphoinositide-3-kinase regulatory subunit 1
SPINT3	serine peptidase inhibitor, Kunitz type 3
NRL	neural retina leucine zipper
TRAV12-2	T cell receptor alpha variable 12-2
DCTN4	dynactin subunit 4
FBXL5	F-box and leucine rich repeat protein 5
ADAMTS5	ADAM metallopeptidase with thrombospondin type 1 motif 5
RPL13AP5///RPL13AP6///SNORD32A///SNORD33///SNORD34///SNORD35A///RPL13A	ribosomal protein L13a pseudogene 5///ribosomal protein L13a pseudogene 6///small nucleolar RNA, C/D box 32A///small nucleolar RNA, C/D box 33///small nucleolar RNA, C/D box 34///small nucleolar RNA, C/D box 35A///ribosomal protein L13a
DNMBP	dynamin binding protein
ARFRP1	ADP ribosylation factor related protein 1
STAR	steroidogenic acute regulatory protein
METTL13	methyltransferase like 13
AGTR1	angiotensin II receptor type 1
UBE2D3	ubiquitin conjugating enzyme E2 D3
BCL2L2	BCL2 like 2
FAM189B	family with sequence similarity 189 member B
ST13	suppression of tumorigenicity 13 (colon carcinoma) (Hsp70 interacting protein)
TCF3	transcription factor 3
NXF1	nuclear RNA export factor 1
NPAP1	nuclear pore associated protein 1
GADD45B	growth arrest and DNA damage inducible beta
ITIH4	inter-alpha-trypsin inhibitor heavy chain family member 4
PYGO1	pygopus family PHD finger 1
GLUL	glutamate-ammonia ligase
CYP11A1	cytochrome P450 family 11 subfamily A member 1
UTP3	UTP3, small subunit processome component homolog (S. cerevisiae)
ARPC4-TTLL3///TTLL3///ARPC4	ARPC4-TTLL3 readthrough///tubulin tyrosine ligase like 3///actin related protein 2/3 complex subunit 4
SERPINB3	serpin family B member 3
MAZ	MYC associated zinc finger protein
SHMT2	serine hydroxymethyltransferase 2
SGPP1	sphingosine-1-phosphate phosphatase 1
GRN	granulin
LOC101928916///NNMT	uncharacterized LOC101928916///nicotinamide N-methyltransferase
IP6K2	inositol hexakisphosphate kinase 2
MIR3654///EEF1G	microRNA 3654///eukaryotic translation elongation factor 1 gamma
TRIP4	thyroid hormone receptor interactor 4
CTSL	cathepsin L
AP3M2	adaptor related protein complex 3 mu 2 subunit
MAP7	microtubule associated protein 7
APOL5	apolipoprotein L5
RAB29	RAB29, member RAS oncogene family
PNO1	partner of NOB1 homolog
NDST2	N-deacetylase and N-sulfotransferase 2
TTC38	tetratricopeptide repeat domain 38
TCOF1	treacle ribosome biogenesis factor 1
CABP5	calcium binding protein 5
ZMIZ1	zinc finger MIZ-type containing 1
TESK2	testis-specific kinase 2
CCDC28B	coiled-coil domain containing 28B
KCNJ15	potassium voltage-gated channel subfamily J member 15
MTX1	metaxin 1
VPS4B	vacuolar protein sorting 4 homolog B
CDH1	cadherin 1
KAT6B	lysine acetyltransferase 6B
RPL30	ribosomal protein L30
NSUN5P1	NOP2/Sun RNA methyltransferase family member 5 pseudogene 1
RNF39	ring finger protein 39
FLAD1	flavin adenine dinucleotide synthetase 1
PTEN	phosphatase and tensin homolog
KIF1C	kinesin family member 1C
PPP3CB	protein phosphatase 3 catalytic subunit beta
CDKN2AIP	CDKN2A interacting protein
ELF1	E74 like ETS transcription factor 1
GSN	gelsolin
TXN	thioredoxin
MSH6	mutS homolog 6
GUK1	guanylate kinase 1
HYMAI	hydatidiform mole associated and imprinted (non-protein coding)
PRDX6	peroxiredoxin 6
FAM124B	family with sequence similarity 124 member B
FRS2	fibroblast growth factor receptor substrate 2
ALG9	ALG9, alpha-1,2-mannosyltransferase
TRIM10	tripartite motif containing 10
ELF5	E74 like ETS transcription factor 5
FOXD1	forkhead box D1
RPS27A	ribosomal protein S27a
PSMD6	proteasome 26S subunit, non-ATPase 6
PHGDH	phosphoglycerate dehydrogenase
PLXDC2	plexin domain containing 2
MFSD6	major facilitator superfamily domain containing 6
FAM76A	family with sequence similarity 76 member A
DHX29	DEAH-box helicase 29
WDFY3	WD repeat and FYVE domain containing 3
TMPO	thymopoietin
RHOA	ras homolog family member A
SFRP1	secreted frizzled related protein 1
HAAO	3-hydroxyanthranilate 3,4-dioxygenase
CUL4B	cullin 4B
MFSD1	major facilitator superfamily domain containing 1
HIBCH	3-hydroxyisobutyryl-CoA hydrolase
ALDH9A1	aldehyde dehydrogenase 9 family member A1
TMEM100	transmembrane protein 100
NDUFA2	NADH:ubiquinone oxidoreductase subunit A2
PLK4	polo like kinase 4
PEX1	peroxisomal biogenesis factor 1
CD1C	CD1c molecule
NETO2	neuropilin and tolloid like 2
NCAPD2	non-SMC condensin I complex subunit D2
MEG3	maternally expressed 3 (non-protein coding)
NRG1	neuregulin 1
CRADD	CASP2 and RIPK1 domain containing adaptor with death domain
SLC30A4	solute carrier family 30 member 4
SULF1	sulfatase 1
GABRA5	gamma-aminobutyric acid type A receptor alpha5 subunit
JAM2	junctional adhesion molecule 2
SGSM3	small G protein signaling modulator 3
RPL18	ribosomal protein L18
RGS12	regulator of G-protein signaling 12
ITIH5	inter-alpha-trypsin inhibitor heavy chain family member 5
PLK3	polo like kinase 3
ARL4C	ADP ribosylation factor like GTPase 4C
EMC3	ER membrane protein complex subunit 3
PARD3	par-3 family cell polarity regulator
KCTD9	potassium channel tetramerization domain containing 9
APOE	apolipoprotein E
SZRD1	SUZ RNA binding domain containing 1
PGAP2	post-GPI attachment to proteins 2
RPS15	ribosomal protein S15
LPIN1	lipin 1
ZNF280A	zinc finger protein 280A
TOR3A	torsin family 3 member A
ARG1	arginase 1
HPGDS	hematopoietic prostaglandin D synthase
FLG	filaggrin
GTF2B	general transcription factor IIB
METTL9	methyltransferase like 9
STUM	stum, mechanosensory transduction mediator homolog
PPP1R3A	protein phosphatase 1 regulatory subunit 3A
RPL31	ribosomal protein L31
LOC102724093///GOLGA6L4///GOLGA6L9///GOLGA6L5P	golgin subfamily A member 6-like protein 4///golgin A6 family-like 4///golgin A6 family-like 9///golgin A6 family-like 5, pseudogene
CREB3L2	cAMP responsive element binding protein 3 like 2
RASGRP2	RAS guanyl releasing protein 2
HOMER3	homer scaffolding protein 3
RFX1	regulatory factor X1
SNORD38B///SNORD55///RPS8	small nucleolar RNA, C/D box 38B///small nucleolar RNA, C/D box 55///ribosomal protein S8
P2RX5	purinergic receptor P2X 5
TUBB6	tubulin beta 6 class V
HNMT	histamine N-methyltransferase
KIAA0101	KIAA0101
GOLGA2	golgin A2
CYLC1	cylicin 1
EIF2S2	eukaryotic translation initiation factor 2 subunit beta
LOC101928615///FNDC3B	uncharacterized LOC101928615///fibronectin type III domain containing 3B
MYO1B	myosin IB
NAPA	NSF attachment protein alpha
ARL6IP5	ADP ribosylation factor like GTPase 6 interacting protein 5
TLE4	transducin like enhancer of split 4
AIM1	absent in melanoma 1
BDKRB1	bradykinin receptor B1
EPO	erythropoietin
CD47	CD47 molecule
E2F4	E2F transcription factor 4
TMEM256-PLSCR3///PLSCR3	TMEM256-PLSCR3 readthrough (NMD candidate)///phospholipid scramblase 3
SPAG4	sperm associated antigen 4
WTH3DI///RAB6A	RAB6C-like///RAB6A, member RAS oncogene family
ATP6V0E1	ATPase H+ transporting V0 subunit e1
PPP1CB	protein phosphatase 1 catalytic subunit beta
ZXDC	ZXD family zinc finger C
OSR2	odd-skipped related transciption factor 2
RALBP1	ralA binding protein 1
GCHFR	GTP cyclohydrolase I feedback regulator
SCRN3	secernin 3
ABI1	abl interactor 1
NPAS2	neuronal PAS domain protein 2
CD99	CD99 molecule
SPAG16	sperm associated antigen 16
KRI1	KRI1 homolog
AASDHPPT	aminoadipate-semialdehyde dehydrogenase-phosphopantetheinyl transferase
MYO18A///TIAF1	myosin XVIIIA///TGFB1-induced anti-apoptotic factor 1
OPTN	optineurin
MICB	MHC class I polypeptide-related sequence B
RPL7	ribosomal protein L7
SORBS1	sorbin and SH3 domain containing 1
DDX11	DEAD/H-box helicase 11
TACC1	transforming acidic coiled-coil containing protein 1
UBBP1	ubiquitin B pseudogene 1
RPL11	ribosomal protein L11
LDLR	low density lipoprotein receptor
BTN2A3P	butyrophilin subfamily 2 member A3, pseudogene
STIM1	stromal interaction molecule 1
TIPIN	TIMELESS interacting protein
VDAC3	voltage dependent anion channel 3
MPC1	mitochondrial pyruvate carrier 1
CXorf36	chromosome X open reading frame 36
CBX2	chromobox 2
SLC18A2	solute carrier family 18 member A2
DEFB1	defensin beta 1
TMEM254	transmembrane protein 254
CRHR1	corticotropin releasing hormone receptor 1
POLR3B	RNA polymerase III subunit B
ARHGAP6	Rho GTPase activating protein 6
A1CF	APOBEC1 complementation factor
ICAM1	intercellular adhesion molecule 1
C3	complement component 3
RFC5	replication factor C subunit 5
MBD2	methyl-CpG binding domain protein 2
CCL15-CCL14///CCL14	CCL15-CCL14 readthrough (NMD candidate)///C-C motif chemokine ligand 14
MGST2	microsomal glutathione S-transferase 2
TMEM159	transmembrane protein 159
VENTX	VENT homeobox
KLK3	kallikrein related peptidase 3
SH3GL3	SH3 domain containing GRB2 like 3, endophilin A3
TMOD3	tropomodulin 3
RPL35	ribosomal protein L35
SHARPIN	SHANK associated RH domain interactor
PFDN5	prefoldin subunit 5
LZTS1	leucine zipper tumor suppressor 1
TAX1BP1	Tax1 binding protein 1
KIAA0355	KIAA0355
PENK	proenkephalin
PTCRA	pre T-cell antigen receptor alpha
IGFBP5	insulin like growth factor binding protein 5
ENC1	ectodermal-neural cortex 1
RNASE4	ribonuclease A family member 4
BLVRA	biliverdin reductase A
COA3	cytochrome c oxidase assembly factor 3
ARSF	arylsulfatase F
UBAP2L	ubiquitin associated protein 2 like
CDRT1	CMT1A duplicated region transcript 1
HCRT	hypocretin neuropeptide precursor
F2RL1	F2R like trypsin receptor 1
RAB38	RAB38, member RAS oncogene family
MAU2	MAU2 sister chromatid cohesion factor
CACNA1I	calcium voltage-gated channel subunit alpha1 I
RPL32	ribosomal protein L32
N4BP3	NEDD4 binding protein 3
FAM127A	family with sequence similarity 127 member A
SPTLC1	serine palmitoyltransferase long chain base subunit 1
DDX3X	DEAD-box helicase 3, X-linked
CDKN3	cyclin dependent kinase inhibitor 3
PRPF4B	pre-mRNA processing factor 4B
PEA15	phosphoprotein enriched in astrocytes 15
NDUFS4	NADH:ubiquinone oxidoreductase subunit S4
PRKCH	protein kinase C eta
EFS	embryonal Fyn-associated substrate
TTC39A	tetratricopeptide repeat domain 39A
CASP4	caspase 4
CDK7	cyclin dependent kinase 7
ETF1	eukaryotic translation termination factor 1
CPA2	carboxypeptidase A2
NME5	NME/NM23 family member 5
CSDE1	cold shock domain containing E1
RPL5///SNORD21	ribosomal protein L5///small nucleolar RNA, C/D box 21
TTN	titin
ZNF706	zinc finger protein 706
AURKB	aurora kinase B
FPGS	folylpolyglutamate synthase
EGR2	early growth response 2
STON1	stonin 1
TUBA3D///TUBA3C	tubulin alpha 3d///tubulin alpha 3c
NPR2	natriuretic peptide receptor 2
SLC35F6	solute carrier family 35 member F6
CSE1L	chromosome segregation 1 like
CA12	carbonic anhydrase 12
NUP93	nucleoporin 93
GABARAP	GABA type A receptor-associated protein
FZD10	frizzled class receptor 10
MORC2	MORC family CW-type zinc finger 2
HLTF	helicase like transcription factor
SMAD5-AS1	SMAD5 antisense RNA 1
SLPI	secretory leukocyte peptidase inhibitor
EPB41L4A-AS2	EPB41L4A antisense RNA 2 (head to head)
CD34	CD34 molecule
RBP4	retinol binding protein 4
SNORA21///RPL23	small nucleolar RNA, H/ACA box 21///ribosomal protein L23
ADRB2	adrenoceptor beta 2
DRP2	dystrophin related protein 2
RUNX3	runt related transcription factor 3
SERPINH1	serpin family H member 1
EMC1	ER membrane protein complex subunit 1
ZNF451	zinc finger protein 451
CEL	carboxyl ester lipase
IMPA2	inositol monophosphatase 2
HOXB6	homeobox B6
ARL1	ADP ribosylation factor like GTPase 1
VAMP2	vesicle associated membrane protein 2
RALGAPA1	Ral GTPase activating protein catalytic alpha subunit 1
ADAR	adenosine deaminase, RNA specific
SNX2	sorting nexin 2
DSTN	destrin, actin depolymerizing factor
ATP1A2	ATPase Na+/K+ transporting subunit alpha 2
PTMS	parathymosin
IL13RA1	interleukin 13 receptor subunit alpha 1
RPL12	ribosomal protein L12
MADCAM1	mucosal vascular addressin cell adhesion molecule 1
VPS13D	vacuolar protein sorting 13 homolog D
SLIT2	slit guidance ligand 2
MIR6778///SHMT1	microRNA 6778///serine hydroxymethyltransferase 1
OSBPL2	oxysterol binding protein like 2
ANK2	ankyrin 2, neuronal
LRRD1///CYP51A1	leucine rich repeats and death domain containing 1///cytochrome P450 family 51 subfamily A member 1
USP25	ubiquitin specific peptidase 25
DUSP9	dual specificity phosphatase 9
NDUFA10	NADH:ubiquinone oxidoreductase subunit A10
RAB1A	RAB1A, member RAS oncogene family
ADAM12	ADAM metallopeptidase domain 12
LGALS3	lectin, galactoside binding soluble 3
LCN2	lipocalin 2
AFF4	AF4/FMR2 family member 4
CORIN	corin, serine peptidase
SLIT3	slit guidance ligand 3
LOC100129518///SOD2	uncharacterized LOC100129518///superoxide dismutase 2, mitochondrial
MLEC	malectin
CYP2F1	cytochrome P450 family 2 subfamily F member 1
GOLM1	golgi membrane protein 1
KRCC1	lysine rich coiled-coil 1
HSF1	heat shock transcription factor 1
PTPN21	protein tyrosine phosphatase, non-receptor type 21
ARHGEF12	Rho guanine nucleotide exchange factor 12
SVEP1	sushi, von Willebrand factor type A, EGF and pentraxin domain containing 1
TACR1	tachykinin receptor 1
TOR1AIP1	torsin 1A interacting protein 1
CSF3R	colony stimulating factor 3 receptor
TYMP	thymidine phosphorylase
LOC101930404///SNORD116-28///SNORD115-26///SNORD115-13///SNORD115-7///SNORD116-22///SNORD116-4///PWARSN///SNORD107///SNRPN///IPW	uncharacterized LOC101930404///small nucleolar RNA, C/D box 116-28///small nucleolar RNA, C/D box 115-26///small nucleolar RNA, C/D box 115-13///small nucleolar RNA, C/D box 115-7///small nucleolar RNA, C/D box 116-22///small nucleolar RNA, C/D box 116-4///Prader Willi/Angelman region RNA, SNRPN neighbor///small nucleolar RNA, C/D box 107///small nuclear ribonucleoprotein polypeptide N///imprinte…
CPED1	cadherin like and PC-esterase domain containing 1
EDN2	endothelin 2
CALML4	calmodulin like 4
DYNC1I2	dynein cytoplasmic 1 intermediate chain 2
SLC25A20	solute carrier family 25 member 20
RPL13AP5///SNORD32A///SNORD33///SNORD34///SNORD35A///RPL13A	ribosomal protein L13a pseudogene 5///small nucleolar RNA, C/D box 32A///small nucleolar RNA, C/D box 33///small nucleolar RNA, C/D box 34///small nucleolar RNA, C/D box 35A///ribosomal protein L13a
ARHGAP32	Rho GTPase activating protein 32
MLIP	muscular LMNA-interacting protein
C6orf106	chromosome 6 open reading frame 106
UNC13B	unc-13 homolog B
ZW10	zw10 kinetochore protein
RNF146	ring finger protein 146
NRG2	neuregulin 2
LTB4R	leukotriene B4 receptor
SHOX	short stature homeobox
SIPA1L3	signal induced proliferation associated 1 like 3
TMPRSS4	transmembrane protease, serine 4
AKR1C1	aldo-keto reductase family 1 member C1
HTR7P1///HTR7	5-hydroxytryptamine receptor 7 pseudogene 1///5-hydroxytryptamine receptor 7
ITGA10	integrin subunit alpha 10
MTCL1	microtubule crosslinking factor 1
GAMT	guanidinoacetate N-methyltransferase
IL11	interleukin 11
RHBG	Rh family B glycoprotein (gene/pseudogene)
CBR4	carbonyl reductase 4
DICER1	dicer 1, ribonuclease III
API5	apoptosis inhibitor 5
CALML5	calmodulin like 5
PLIN3	perilipin 3
PABPC1	poly(A) binding protein cytoplasmic 1
ELF4	E74 like ETS transcription factor 4
LMF2	lipase maturation factor 2
TPT1P8	tumor protein, translationally-controlled 1 pseudogene 8
SLC24A2	solute carrier family 24 member 2
ANKRD46	ankyrin repeat domain 46
WNT5A	Wnt family member 5A
HIST1H2BL	histone cluster 1, H2bl
TRIOBP	TRIO and F-actin binding protein
RXRA	retinoid X receptor alpha
SIX1	SIX homeobox 1
ATP5H	ATP synthase, H+ transporting, mitochondrial Fo complex subunit D
WNT6	Wnt family member 6
NBEAL1///RPL12	neurobeachin like 1///ribosomal protein L12
SEC24B	SEC24 homolog B, COPII coat complex component
ABHD17A	abhydrolase domain containing 17A
SCGB1D1	secretoglobin family 1D member 1
MAPKBP1	mitogen-activated protein kinase binding protein 1
HMGN5	high mobility group nucleosome binding domain 5
CNTNAP1	contactin associated protein 1
SCNN1D	sodium channel epithelial 1 delta subunit
CD180	CD180 molecule
SEMA4D	semaphorin 4D
CREBL2	cAMP responsive element binding protein like 2
LSS	lanosterol synthase (2,3-oxidosqualene-lanosterol cyclase)
APC	APC, WNT signaling pathway regulator
TBC1D19	TBC1 domain family member 19
DUSP3	dual specificity phosphatase 3
MLX	MLX, MAX dimerization protein
NNAT	neuronatin
RORB	RAR related orphan receptor B
ZNF614	zinc finger protein 614
NACA	nascent polypeptide-associated complex alpha subunit
LGR4	leucine rich repeat containing G protein-coupled receptor 4
MIR1204///PVT1	microRNA 1204///Pvt1 oncogene (non-protein coding)
RWDD1	RWD domain containing 1
MYL5	myosin light chain 5
DBT	dihydrolipoamide branched chain transacylase E2
CSRP2	cysteine and glycine rich protein 2
MAD2L1	MAD2 mitotic arrest deficient-like 1 (yeast)
TMEM8B	transmembrane protein 8B
GTF2H5	general transcription factor IIH subunit 5
FAM186A	family with sequence similarity 186 member A
CHPF2	chondroitin polymerizing factor 2
THOC6	THO complex 6
REV3L	REV3 like, DNA directed polymerase zeta catalytic subunit
SERPINB4///SERPINB3	serpin family B member 4///serpin family B member 3
SSFA2	sperm specific antigen 2
MAP4K5	mitogen-activated protein kinase kinase kinase kinase 5
STK19	serine/threonine kinase 19
MAP2	microtubule associated protein 2
SLC16A1	solute carrier family 16 member 1
PIP5K1B	phosphatidylinositol-4-phosphate 5-kinase type 1 beta
ZCCHC6	zinc finger CCHC-type containing 6
YOD1	YOD1 deubiquitinase
CDX4	caudal type homeobox 4
SNORA3A///RPL27A	small nucleolar RNA, H/ACA box 3A///ribosomal protein L27a
SMARCA4	SWI/SNF related, matrix associated, actin dependent regulator of chromatin, subfamily a, member 4
PRMT2	protein arginine methyltransferase 2
VPS53	VPS53, GARP complex subunit
MIR6849///MIR1234///MIR939///CPSF1	microRNA 6849///microRNA 1234///microRNA 939///cleavage and polyadenylation specific factor 1
CDKL5	cyclin dependent kinase like 5
ADAM5	ADAM metallopeptidase domain 5 (pseudogene)
THBS1	thrombospondin 1
TRDMT1	tRNA aspartic acid methyltransferase 1
XKR8	XK related 8
SEPT9	septin 9
RPS6KB2	ribosomal protein S6 kinase B2
EIF3A	eukaryotic translation initiation factor 3 subunit A
CHEK1	checkpoint kinase 1
ATP6V1E1	ATPase H+ transporting V1 subunit E1
GATB	glutamyl-tRNA amidotransferase subunit B
HK1	hexokinase 1
LOC101930241///ARHGEF4	rho guanine nucleotide exchange factor 4-like///Rho guanine nucleotide exchange factor 4
SNCA	synuclein alpha
PI4K2A	phosphatidylinositol 4-kinase type 2 alpha
CDC25C	cell division cycle 25C
ZNF580	zinc finger protein 580
RLIM///PABPC1	ring finger protein, LIM domain interacting///poly(A) binding protein cytoplasmic 1
GUCY2D	guanylate cyclase 2D, retinal
SLC38A1	solute carrier family 38 member 1
LSM4	LSM4 homolog, U6 small nuclear RNA and mRNA degradation associated
LSAMP	limbic system-associated membrane protein
OAZ2	ornithine decarboxylase antizyme 2
IFT122	intraflagellar transport 122
RPL27	ribosomal protein L27
IGHD	immunoglobulin heavy constant delta
GCOM1///POLR2M	GRINL1A complex locus 1///RNA polymerase II subunit M
ZNF257	zinc finger protein 257
SNORA70///RPL10	small nucleolar RNA, H/ACA box 70///ribosomal protein L10
GRIA3	glutamate ionotropic receptor AMPA type subunit 3
RASAL1	RAS protein activator like 1
PBK	PDZ binding kinase
HSPB6	heat shock protein family B (small) member 6
TUSC2	tumor suppressor candidate 2
TIMM10B	translocase of inner mitochondrial membrane 10 homolog B (yeast)
BMP10	bone morphogenetic protein 10
PHF7	PHD finger protein 7
RANBP1	RAN binding protein 1
FTH1	ferritin heavy chain 1
DESI1	desumoylating isopeptidase 1
APBA2	amyloid beta precursor protein binding family A member 2
TRIM6-TRIM34///TRIM34	TRIM6-TRIM34 readthrough///tripartite motif containing 34
BAZ2A	bromodomain adjacent to zinc finger domain 2A
GH1	growth hormone 1
PLA2G7	phospholipase A2 group VII
SLC48A1	solute carrier family 48 member 1
PRPF18	pre-mRNA processing factor 18
COMMD10	COMM domain containing 10
CXCL9	C-X-C motif chemokine ligand 9
TBC1D4	TBC1 domain family member 4
PAFAH1B1	platelet activating factor acetylhydrolase 1b regulatory subunit 1
ARHGAP24	Rho GTPase activating protein 24
WSCD2	WSC domain containing 2
RPL38	ribosomal protein L38
SPHAR///RAB4A	S-phase response (cyclin related)///RAB4A, member RAS oncogene family
DAZ4///DAZ2///DAZ3///DAZ1	deleted in azoospermia 4///deleted in azoospermia 2///deleted in azoospermia 3///deleted in azoospermia 1
SERPINI1	serpin family I member 1
MTMR14	myotubularin related protein 14
TTI1	TELO2 interacting protein 1
RPL36	ribosomal protein L36
PKM	pyruvate kinase, muscle
VAMP5	vesicle associated membrane protein 5
SAP18	Sin3A associated protein 18
ITIH3	inter-alpha-trypsin inhibitor heavy chain 3
SUOX	sulfite oxidase
ARF4	ADP ribosylation factor 4
VN1R1	vomeronasal 1 receptor 1
BCL11B	B-cell CLL/lymphoma 11B
S100A8	S100 calcium binding protein A8
THPO	thrombopoietin
ZNF430	zinc finger protein 430
VPS28	VPS28, ESCRT-I subunit
CD55	CD55 molecule (Cromer blood group)
INO80B	INO80 complex subunit B
CSF1	colony stimulating factor 1
GHR	growth hormone receptor
WWOX	WW domain containing oxidoreductase
TMEM115	transmembrane protein 115
SULT1E1	sulfotransferase family 1E member 1
PCDHGA3///PCDHGA5///PCDHGA6///PCDHGA10///PCDHGA11///PCDHGA12///PCDHGC3	protocadherin gamma subfamily A, 3///protocadherin gamma subfamily A, 5///protocadherin gamma subfamily A, 6///protocadherin gamma subfamily A, 10///protocadherin gamma subfamily A, 11///protocadherin gamma subfamily A, 12///protocadherin gamma subfamily C, 3
GFRA2	GDNF family receptor alpha 2
HSDL2	hydroxysteroid dehydrogenase like 2
MAPK3	mitogen-activated protein kinase 3
AMFR	autocrine motility factor receptor
PANK3	pantothenate kinase 3
RFC1	replication factor C subunit 1
CCNE2	cyclin E2
ICOSLG	inducible T-cell costimulator ligand
EXTL3	exostosin like glycosyltransferase 3
HAUS7///TREX2	HAUS augmin like complex subunit 7///three prime repair exonuclease 2
HEXIM1	hexamethylene bisacetamide inducible 1
ORC1	origin recognition complex subunit 1
KIAA1211L	KIAA1211 like
FAM50A	family with sequence similarity 50 member A
SIK3	SIK family kinase 3
RCOR1	REST corepressor 1
APOA1	apolipoprotein A1
C10orf10	chromosome 10 open reading frame 10
C22orf29///GNB1L	chromosome 22 open reading frame 29///G protein subunit beta 1 like
NMT1	N-myristoyltransferase 1
RPL3	ribosomal protein L3
CCR9	C-C motif chemokine receptor 9
CGRRF1	cell growth regulator with ring finger domain 1
DACH1	dachshund family transcription factor 1
ELL3	elongation factor for RNA polymerase II 3
TSPYL4	TSPY like 4
GALNT2	polypeptide N-acetylgalactosaminyltransferase 2
KMT2D	lysine methyltransferase 2D
YES1	YES proto-oncogene 1, Src family tyrosine kinase
SAT1	spermidine/spermine N1-acetyltransferase 1
LIN7C	lin-7 homolog C, crumbs cell polarity complex component
TDRD3	tudor domain containing 3
PLAGL2	PLAG1 like zinc finger 2
WDR48	WD repeat domain 48
RPL19	ribosomal protein L19
DOK3	docking protein 3
ARHGEF28	Rho guanine nucleotide exchange factor 28
GRK1	G protein-coupled receptor kinase 1
RAB3IL1	RAB3A interacting protein like 1
EHMT2	euchromatic histone lysine methyltransferase 2
CHMP1B	charged multivesicular body protein 1B
XYLT1	xylosyltransferase 1
DTX4	deltex E3 ubiquitin ligase 4
C15orf39	chromosome 15 open reading frame 39
EFCAB14	EF-hand calcium binding domain 14
DLGAP4	DLG associated protein 4
FTH1P5	ferritin heavy chain 1 pseudogene 5
MIR6756///MCAM	microRNA 6756///melanoma cell adhesion molecule
HYPM	huntingtin interacting protein M
TFAP2C	transcription factor AP-2 gamma
HPRT1	hypoxanthine phosphoribosyltransferase 1
TCTN2	tectonic family member 2
DNAJC17	DnaJ heat shock protein family (Hsp40) member C17
POLR2L	RNA polymerase II subunit L
SH3GL1	SH3 domain containing GRB2 like 1, endophilin A2
KIAA0509	uncharacterized LOC57242
AIMP1	aminoacyl tRNA synthetase complex interacting multifunctional protein 1
TOP3B	topoisomerase (DNA) III beta
APOM	apolipoprotein M
MTSS1	metastasis suppressor 1
ARID5B	AT-rich interaction domain 5B
SFTPD	surfactant protein D
CTNNA1	catenin alpha 1
CD2BP2	CD2 cytoplasmic tail binding protein 2
CLN8	ceroid-lipofuscinosis, neuronal 8
EIF3H	eukaryotic translation initiation factor 3 subunit H
BTF3	basic transcription factor 3
IDS	iduronate 2-sulfatase
GRIK1-AS2///BACH1	GRIK1 antisense RNA 2///BTB domain and CNC homolog 1
PDXK	pyridoxal (pyridoxine, vitamin B6) kinase
DFFB	DNA fragmentation factor subunit beta
CXCL11	C-X-C motif chemokine ligand 11
KRT32	keratin 32
PDZRN3	PDZ domain containing ring finger 3
CLDN18	claudin 18
KIF15	kinesin family member 15
INHA	inhibin alpha subunit
CD320	CD320 molecule
TXN2	thioredoxin 2
DSN1	DSN1 homolog, MIS12 kinetochore complex component
CDR1	cerebellar degeneration related protein 1
ADRA2A	adrenoceptor alpha 2A
CLN6	ceroid-lipofuscinosis, neuronal 6, late infantile, variant
RFX5	regulatory factor X5
OLFML1	olfactomedin like 1
XPNPEP2	X-prolyl aminopeptidase 2
ABHD5	abhydrolase domain containing 5
ARFIP1	ADP ribosylation factor interacting protein 1
CX3CR1	C-X3-C motif chemokine receptor 1
SNORD96A///SNORD95///RACK1	small nucleolar RNA, C/D box 96A///small nucleolar RNA, C/D box 95///receptor for activated C kinase 1
DCAF11	DDB1 and CUL4 associated factor 11
BICD2	BICD cargo adaptor 2
FAM49A	family with sequence similarity 49 member A
IGK///IGKC	immunoglobulin kappa locus///immunoglobulin kappa constant
ANKHD1-EIF4EBP3///ANKHD1	ANKHD1-EIF4EBP3 readthrough///ankyrin repeat and KH domain containing 1
CGGBP1	CGG triplet repeat binding protein 1
GPLD1	glycosylphosphatidylinositol specific phospholipase D1
ABCB1	ATP binding cassette subfamily B member 1
CA4	carbonic anhydrase 4
SIAH2	siah E3 ubiquitin protein ligase 2
TMC5	transmembrane channel like 5
DST	dystonin
C2CD2L	C2CD2 like
SLC38A4	solute carrier family 38 member 4
NFATC2IP	nuclear factor of activated T-cells 2 interacting protein
PDZD7	PDZ domain containing 7
PLEKHG6	pleckstrin homology and RhoGEF domain containing G6
RAB14	RAB14, member RAS oncogene family
USP7	ubiquitin specific peptidase 7
FBXW11	F-box and WD repeat domain containing 11
OPCML	opioid binding protein/cell adhesion molecule like
RUNDC3B	RUN domain containing 3B
TMEM259	transmembrane protein 259
STK38L	serine/threonine kinase 38 like
FASTKD2	FAST kinase domains 2
ZNF75D	zinc finger protein 75D
DUSP5	dual specificity phosphatase 5
ZMYND10	zinc finger MYND-type containing 10
EYA1	EYA transcriptional coactivator and phosphatase 1
COG5	component of oligomeric golgi complex 5
CHMP2A	charged multivesicular body protein 2A
EPS8L1	EPS8 like 1
GDAP1L1	ganglioside induced differentiation associated protein 1 like 1
TFAM	transcription factor A, mitochondrial
PARP2	poly(ADP-ribose) polymerase 2
PDAP1	PDGFA associated protein 1
RPS17	ribosomal protein S17
KAT5	lysine acetyltransferase 5
KLHL9	kelch like family member 9
RPE	ribulose-5-phosphate-3-epimerase
MFN2	mitofusin 2
MMP11	matrix metallopeptidase 11
HMGB3P1	high mobility group box 3 pseudogene 1
ZNF675	zinc finger protein 675
WDR41	WD repeat domain 41
B3GALT4	beta-1,3-galactosyltransferase 4
ARC	activity regulated cytoskeleton associated protein
ITGBL1	integrin subunit beta like 1
CRKL	CRK like proto-oncogene, adaptor protein
MMP16	matrix metallopeptidase 16
MED31	mediator complex subunit 31
PCYOX1	prenylcysteine oxidase 1
NCKAP1	NCK associated protein 1
EXOG	endo/exonuclease (5'-3'), endonuclease G-like
BAX	BCL2 associated X, apoptosis regulator
RETSAT	retinol saturase
C1QTNF9B-AS1	C1QTNF9B antisense RNA 1
C1QTNF3-AMACR///AMACR	C1QTNF3-AMACR readthrough (NMD candidate)///alpha-methylacyl-CoA racemase
CACYBP	calcyclin binding protein
SEZ6L2	seizure related 6 homolog like 2
CBR3	carbonyl reductase 3
OR6A2	olfactory receptor family 6 subfamily A member 2
PRDM12	PR/SET domain 12
SPTLC2	serine palmitoyltransferase long chain base subunit 2
APC2	APC2, WNT signaling pathway regulator
MIR3656///TRAPPC4	microRNA 3656///trafficking protein particle complex 4
DLEU1	deleted in lymphocytic leukemia 1
TRAPPC3	trafficking protein particle complex 3
PTPRA	protein tyrosine phosphatase, receptor type A
UQCRC2	ubiquinol-cytochrome c reductase core protein II
NHP2	NHP2 ribonucleoprotein
KLRB1	killer cell lectin like receptor B1
E2F8	E2F transcription factor 8
HSPG2	heparan sulfate proteoglycan 2
ATP6V1G2	ATPase H+ transporting V1 subunit G2
RNF208	ring finger protein 208
RGS11	regulator of G-protein signaling 11
P2RX7	purinergic receptor P2X 7
DHX35	DEAH-box helicase 35
DDX3Y	DEAD-box helicase 3, Y-linked
C17orf62	chromosome 17 open reading frame 62
ZNF394	zinc finger protein 394
AGFG2	ArfGAP with FG repeats 2
ARF6	ADP ribosylation factor 6
FANCL	Fanconi anemia complementation group L
HAND1	heart and neural crest derivatives expressed 1
SORL1	sortilin related receptor 1
UQCRQ	ubiquinol-cytochrome c reductase complex III subunit VII
JTB	jumping translocation breakpoint
LOC101929368///FKBP1A	uncharacterized LOC101929368///FK506 binding protein 1A
CLEC16A	C-type lectin domain family 16 member A
LHPP	phospholysine phosphohistidine inorganic pyrophosphate phosphatase
SFT2D2	SFT2 domain containing 2
ANKHD1-EIF4EBP3///ANKHD1///EIF4EBP3	ANKHD1-EIF4EBP3 readthrough///ankyrin repeat and KH domain containing 1///eukaryotic translation initiation factor 4E binding protein 3
MLLT10	myeloid/lymphoid or mixed-lineage leukemia; translocated to, 10
DYNLRB1	dynein light chain roadblock-type 1
SUCLG1	succinate-CoA ligase alpha subunit
RAF1	Raf-1 proto-oncogene, serine/threonine kinase
SP4	Sp4 transcription factor
GALNT11	polypeptide N-acetylgalactosaminyltransferase 11
RPS16	ribosomal protein S16
KCNC3	potassium voltage-gated channel subfamily C member 3
ABHD2	abhydrolase domain containing 2
LAMA2	laminin subunit alpha 2
IFI35	interferon induced protein 35
HSPA4L	heat shock protein family A (Hsp70) member 4 like
ROBO4	roundabout guidance receptor 4
KCNAB3	potassium voltage-gated channel subfamily A regulatory beta subunit 3
RNF167	ring finger protein 167
JUND	JunD proto-oncogene, AP-1 transcription factor subunit
SWAP70	SWAP switching B-cell complex 70kDa subunit
SEMA5A	semaphorin 5A
BUB1B	BUB1 mitotic checkpoint serine/threonine kinase B
CREB3L1	cAMP responsive element binding protein 3 like 1
ZNF24	zinc finger protein 24
TRIP13	thyroid hormone receptor interactor 13
SMAP1	small ArfGAP 1
WEE1	WEE1 G2 checkpoint kinase
GSK3A	glycogen synthase kinase 3 alpha
LINC00652	long intergenic non-protein coding RNA 652
ACVRL1	activin A receptor like type 1
FAM131B	family with sequence similarity 131 member B
FLII	FLII, actin remodeling protein
IL22RA1	interleukin 22 receptor subunit alpha 1
DNAJA1	DnaJ heat shock protein family (Hsp40) member A1
DHRS4L2///DHRS4	dehydrogenase/reductase 4 like 2///dehydrogenase/reductase 4
GTPBP1	GTP binding protein 1
CCHCR1	coiled-coil alpha-helical rod protein 1
RARRES1	retinoic acid receptor responder 1
OTUD7B	OTU deubiquitinase 7B
PLAUR	plasminogen activator, urokinase receptor
ZNF702P	zinc finger protein 702, pseudogene
PTGES	prostaglandin E synthase
PTPRD	protein tyrosine phosphatase, receptor type D
[truncated: 3,930 more rows]
