# Supplementary material for: Knockdown of RBM15 inhibits tumor progression and the JAK-STAT signaling pathway in cervical cancer
Source: BMC Cancer. 2023 Jul 20;23:684. doi: 10.1186/s12885-023-11163-z (PMC10360283; doi:10.1186/s12885-023-11163-z)
Supplement: Supplementary file 6 — Supplementary Material 6 [file 12885_2023_11163_MOESM6_ESM.xlsx]

## Sheet: Sheet1
GENE
METTL3	Writers
METTL14	Writers
ZC3H13	Writers
WTAP	Writers
METTL16	Writers
RBM15	Writers
RBM15B	Writers
VIRMA	Writers
CBLL1	Writers
LRPPRC	Readers
FTO	Eraser
ALKBH5	Eraser
HNRNPC	Readers
HNRNPG	Readers
IGF2BP1	Readers
YTHDC1	Readers
YTHDF2	Readers
YTHDF1	Readers
YTHDF3	Readers
YTHDC2	Readers
eIF3	Readers
HNRNPA2B1	Readers
IGF2BP2	Readers
IGF2BP3	Readers
